# Supplementary material
Source: PubMed Central journal article supplement (PMC3739472)
Supplement: NIHMS474886-supplement-1.pdf [file NIHMS474886-supplement-1.pdf]

# Seven New Loci Associated with Age-Related Macular Degeneration

The AMD Gene Consortium

Supplementary Online Material:

Supplementary Figures 1–4

Supplementary Tables 1–11

Supplementary Note

Funding Sources

Supplementary References

**SUPPLEMENTARY FIGURE 1. Quantile-Quantile plot.** This Q-Q plot compares the actual distribution of p-values with the expected distribution under the null, both for the full set of GWAS results and after excluding variants within 1Mb of known loci.

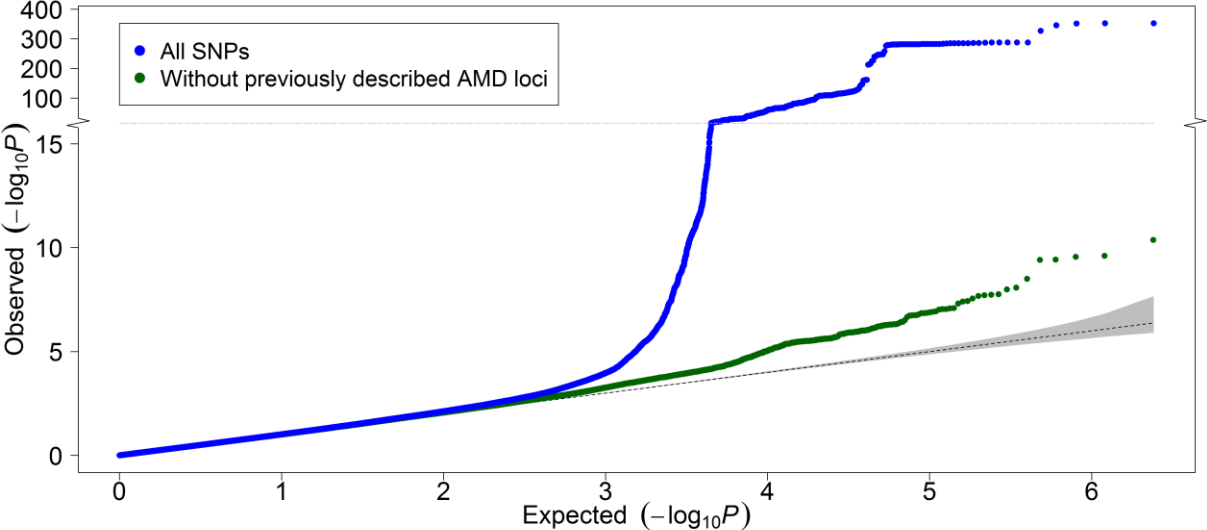

**SUPPLEMENTARY FIGURE 2. Sensitivity analysis for each of the 19 index SNPs.** We repeated the original discovery analysis (which compared advanced AMD cases to controls) with an age adjustment (and also excluding subjects whose age was unknown) or stratified by sex, AMD subtype (GA: geographic atrophy; CNV: choroidal neovascularization) or ethnicity. Odds ratios and corresponding 95% confidence intervals are shown with the area of each rectangle representing the precision of the effect estimates ( $1/SE^2$ ).

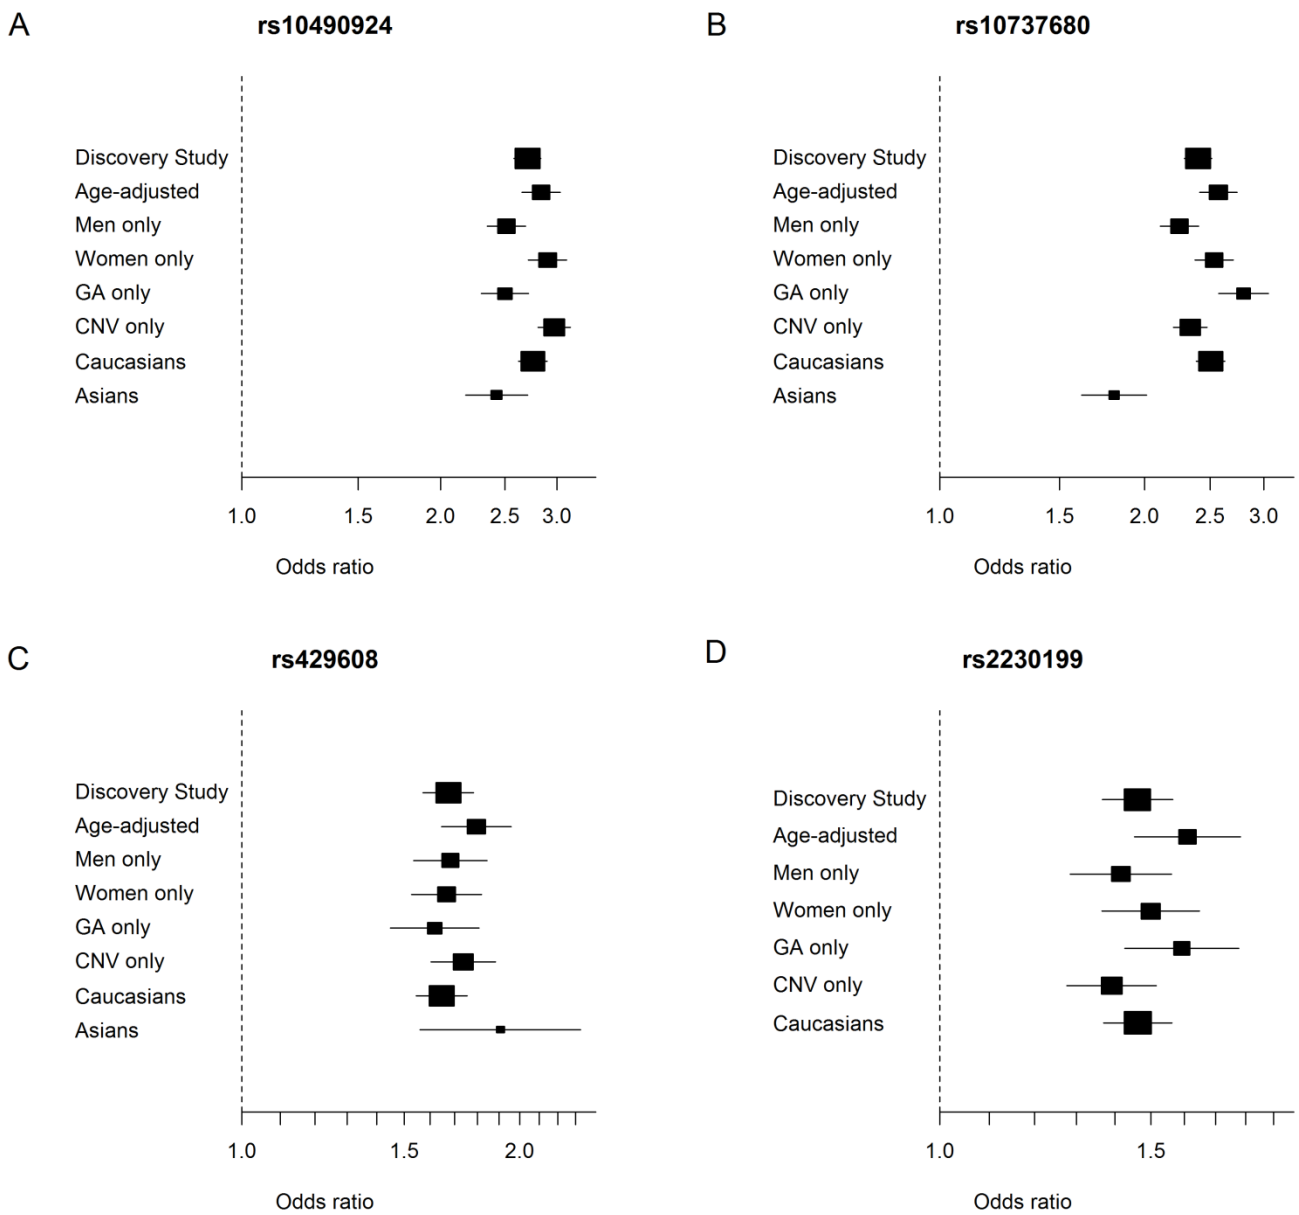

**E****rs5749482**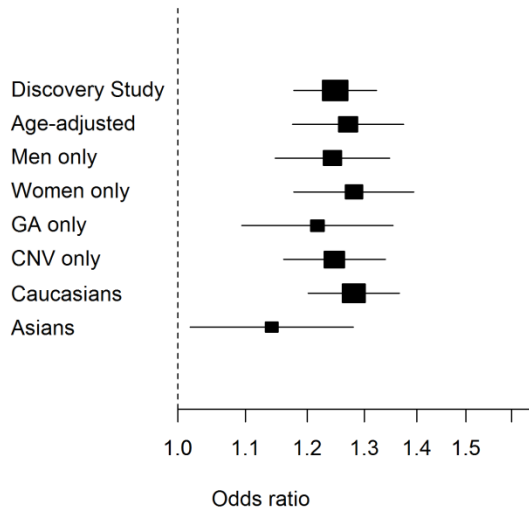**F****rs4420638**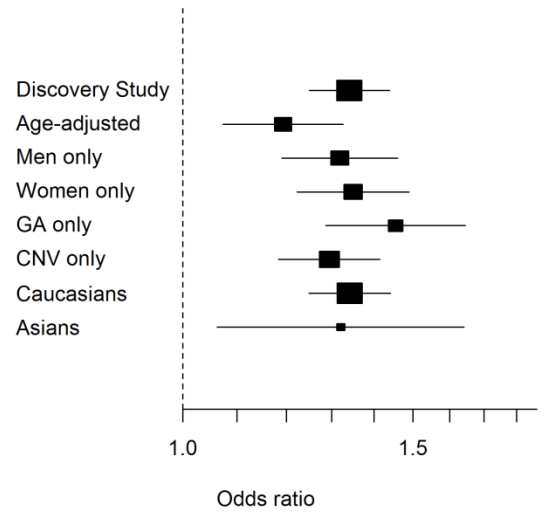**G****rs1864163**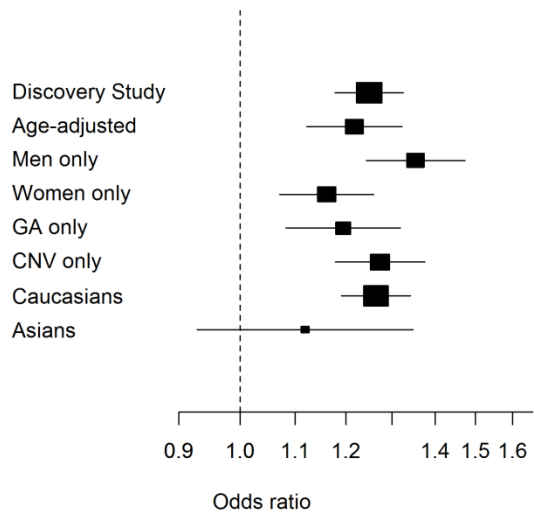**H****rs943080**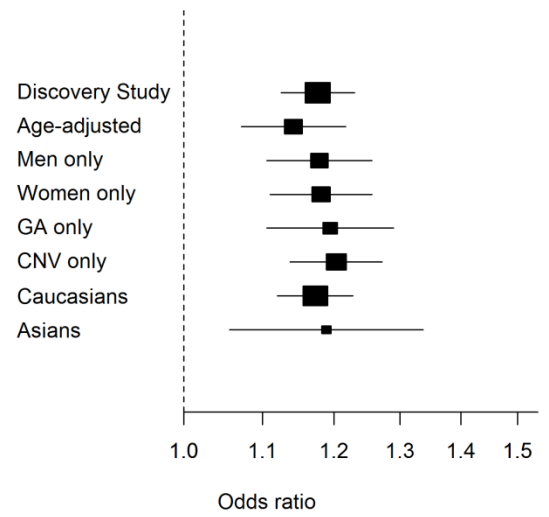**I****rs13278062**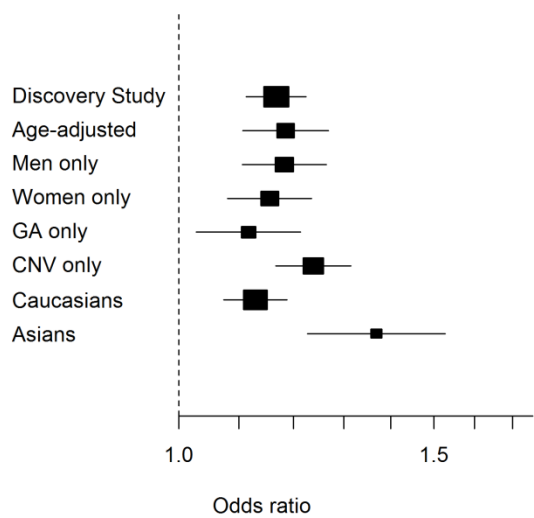**J****rs13081855**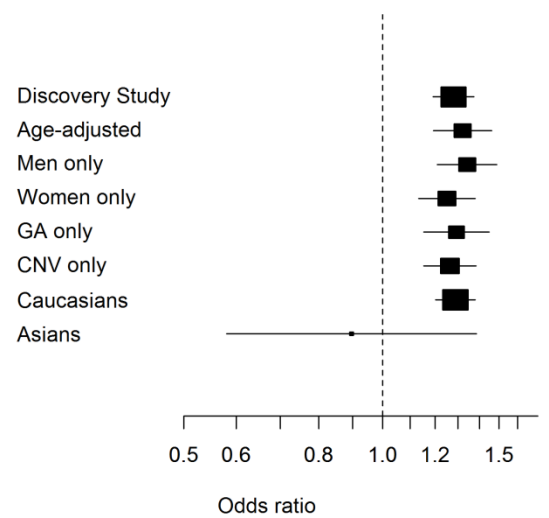

K

rs3130783

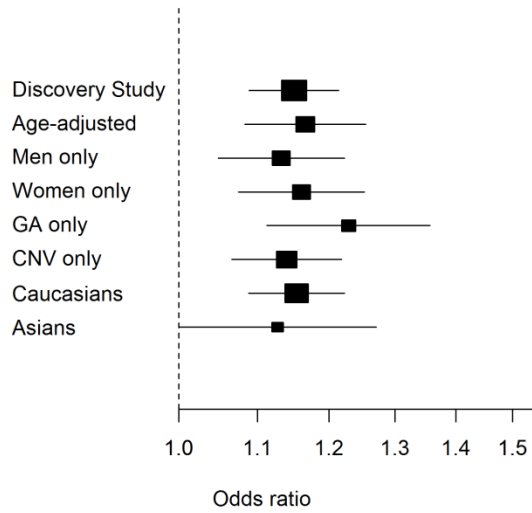

L

rs8135665

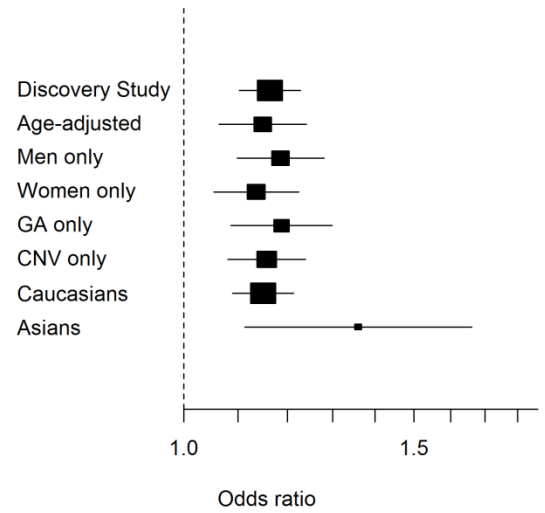

M

rs334353

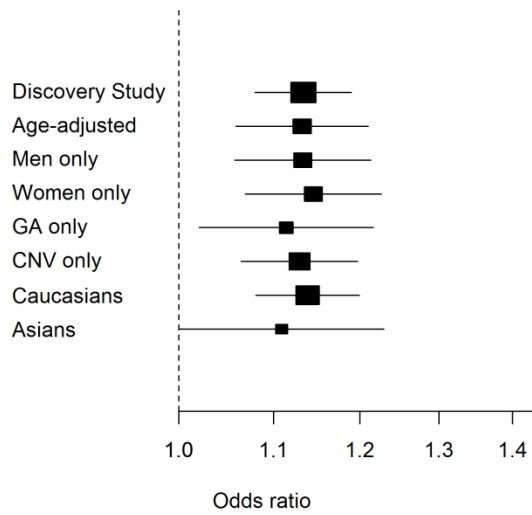

N

rs920915

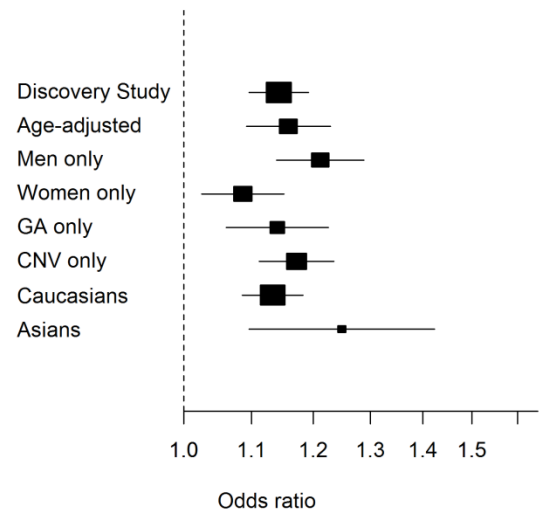

O

rs4698775

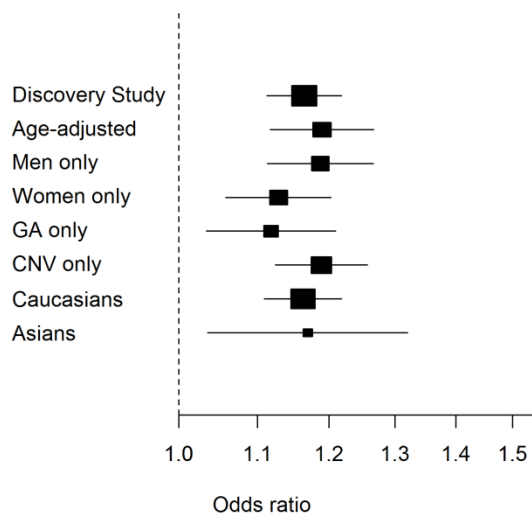

P

rs8017304

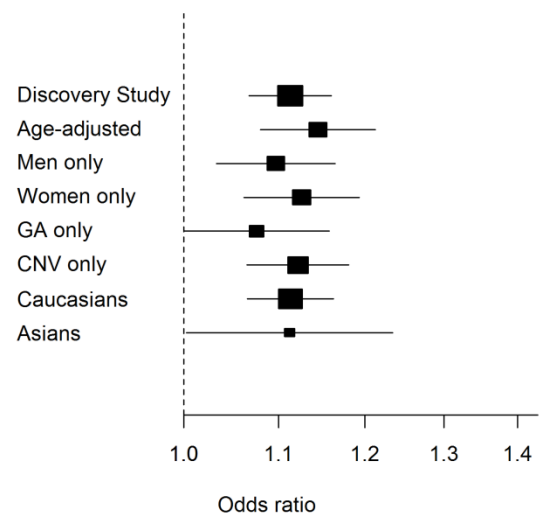

Q

rs6795735

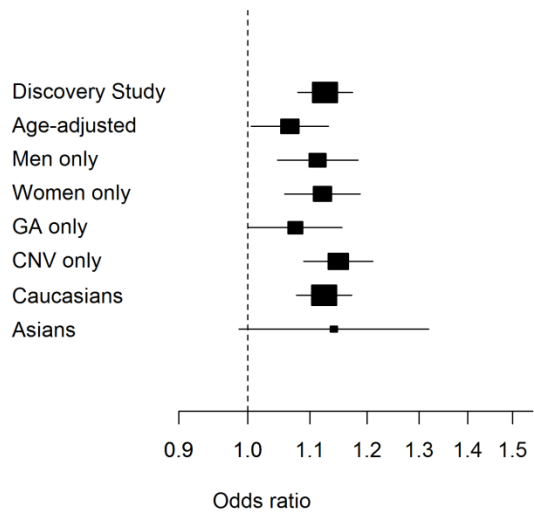

R

rs3812111

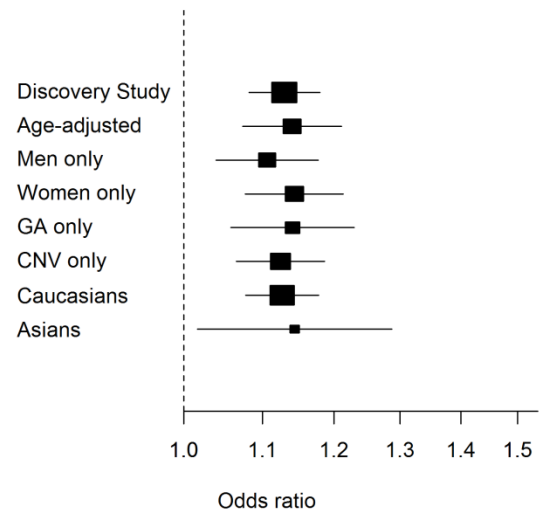

S

rs9542236

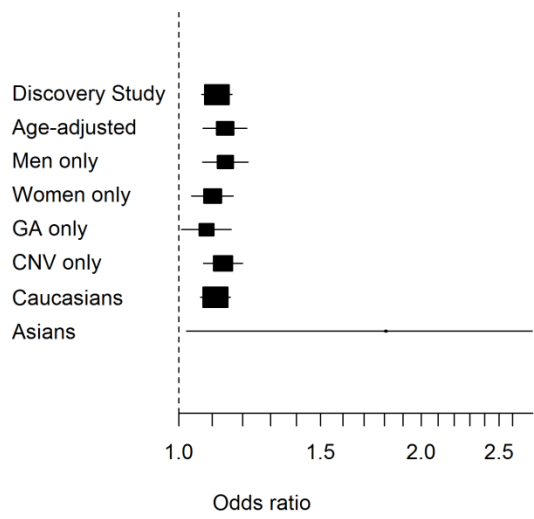

**SUPPLEMENTARY FIGURE 3. Zoomplots summarizing association results for each locus.** Each panel summarizes association results in the neighborhood of a previously described or confirmed locus. Variants are color coded according to the linkage disequilibrium between them and the most strongly associated SNP in each region. Coding variants are displayed as triangles. For additional details on format, please see Pruim <sup>1</sup>.

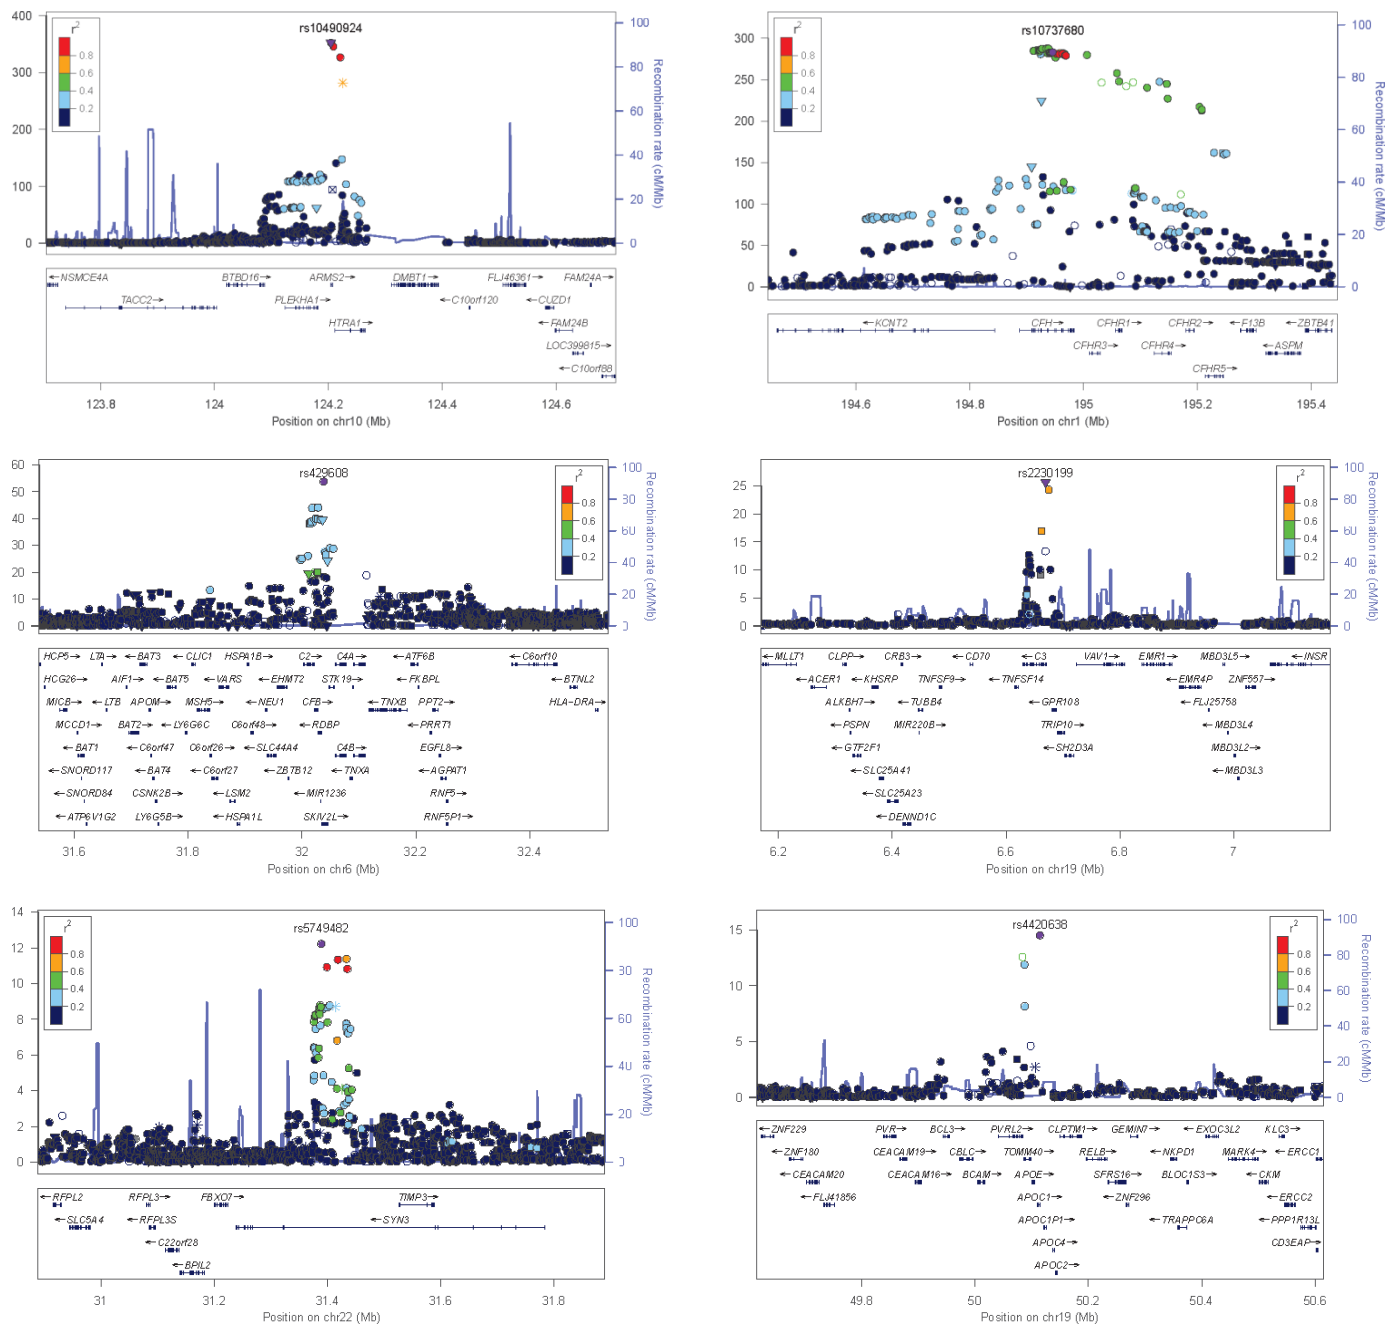

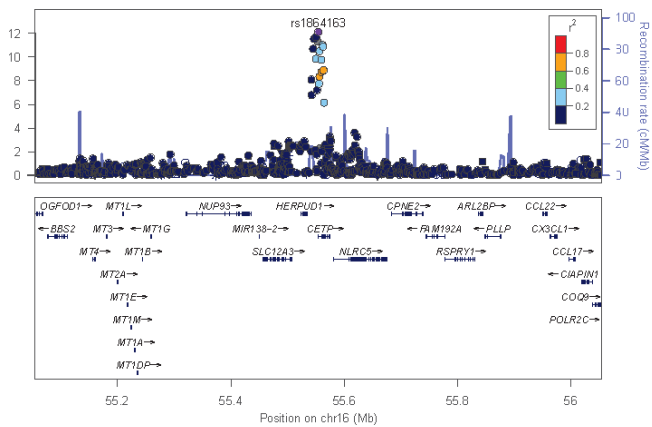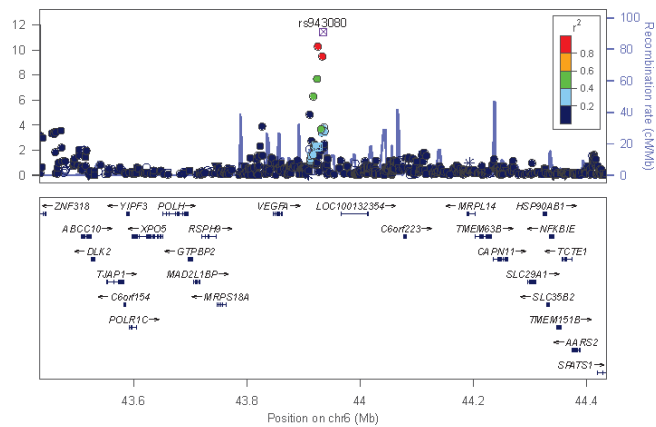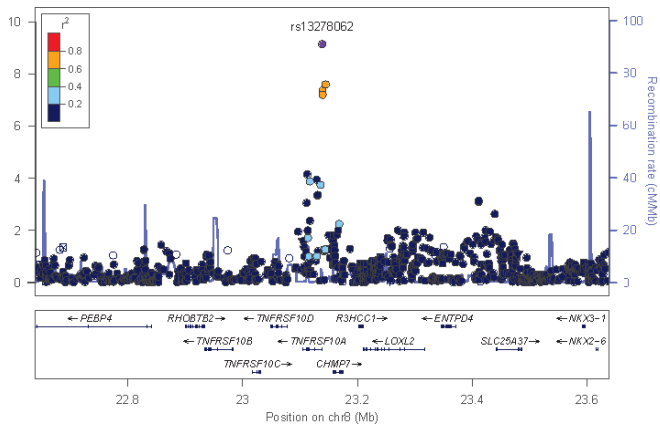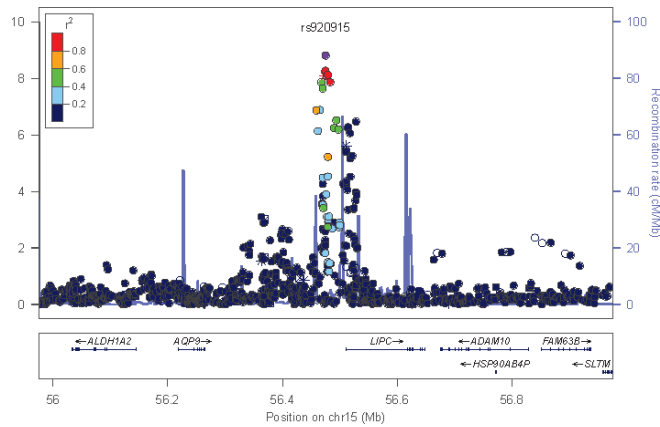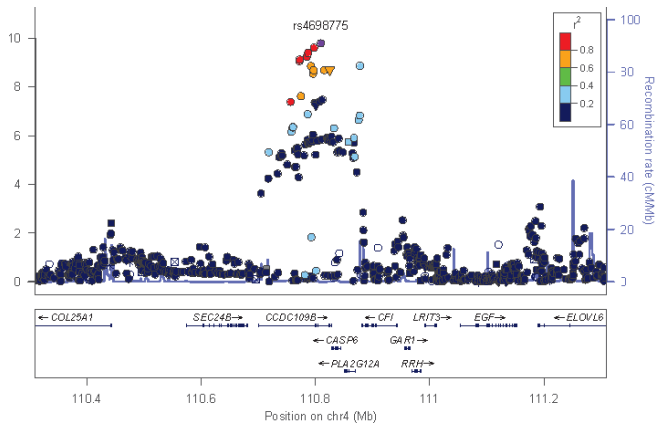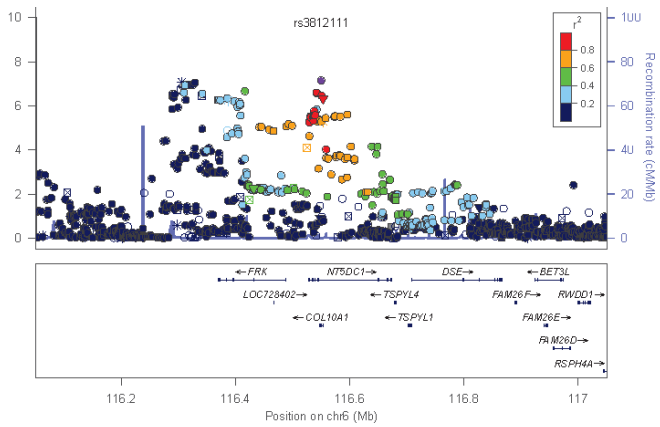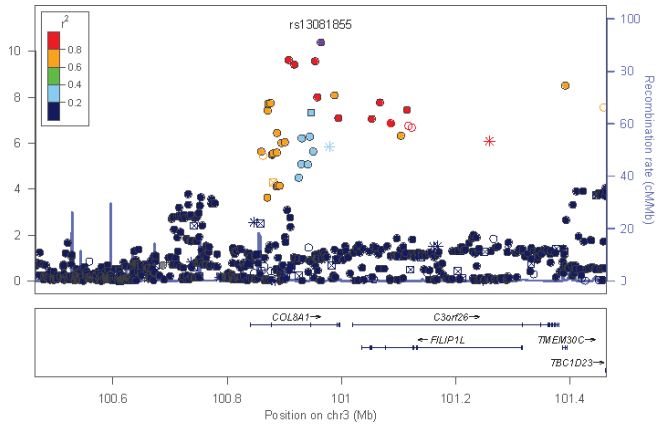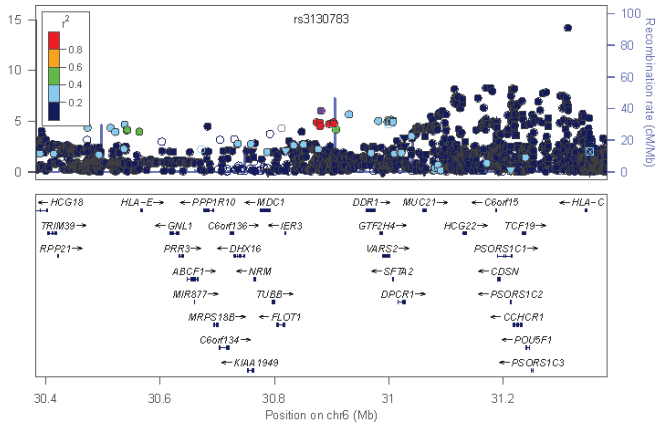



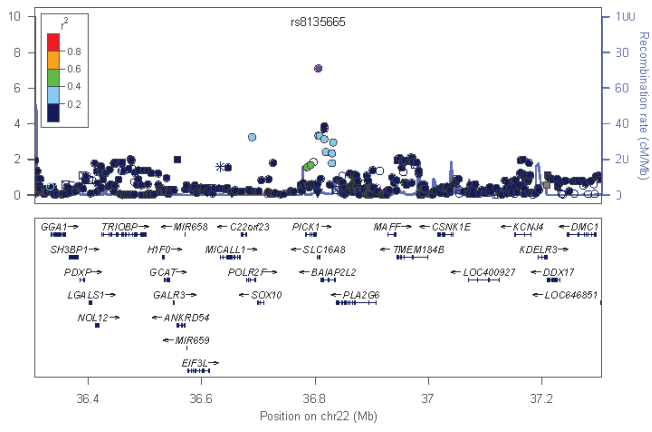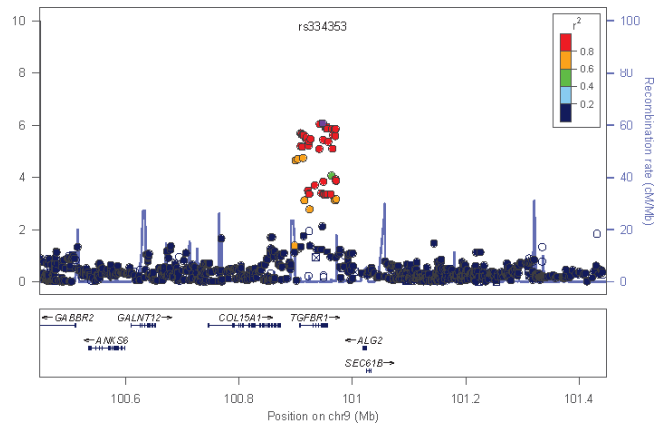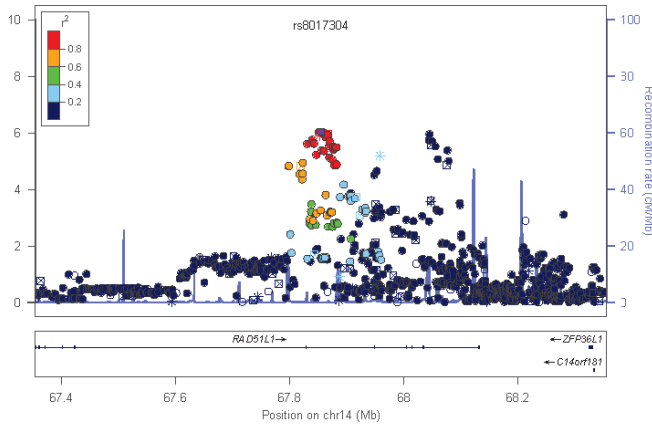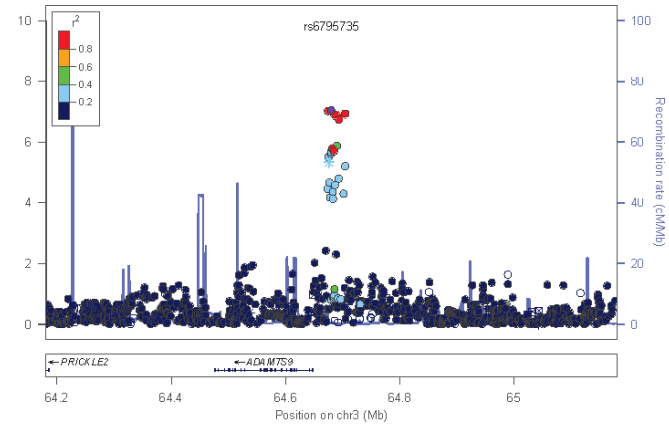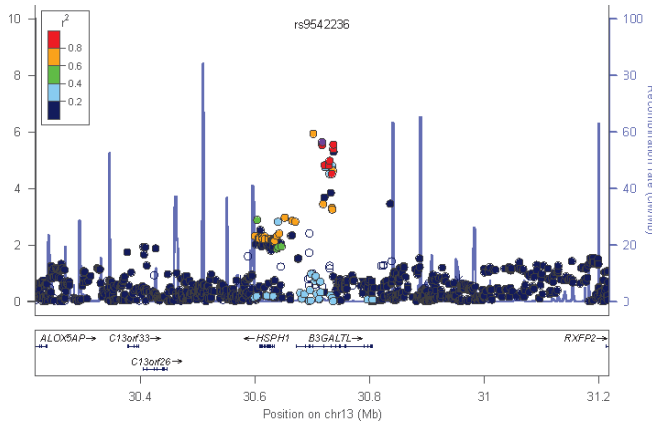

**SUPPLEMENTARY FIGURE 4. Risk score analysis of individual samples.** We calculated a risk score for each individual, defined as the product of the number of risk alleles at each locus and the associated effect size for each allele (measured on the log-odds scale). The plot summarizes the ability of these overall genetic risk scores to distinguish cases and controls. The analysis was repeated for each sample and, as shown, gave generally very consistent results in all the samples examined.

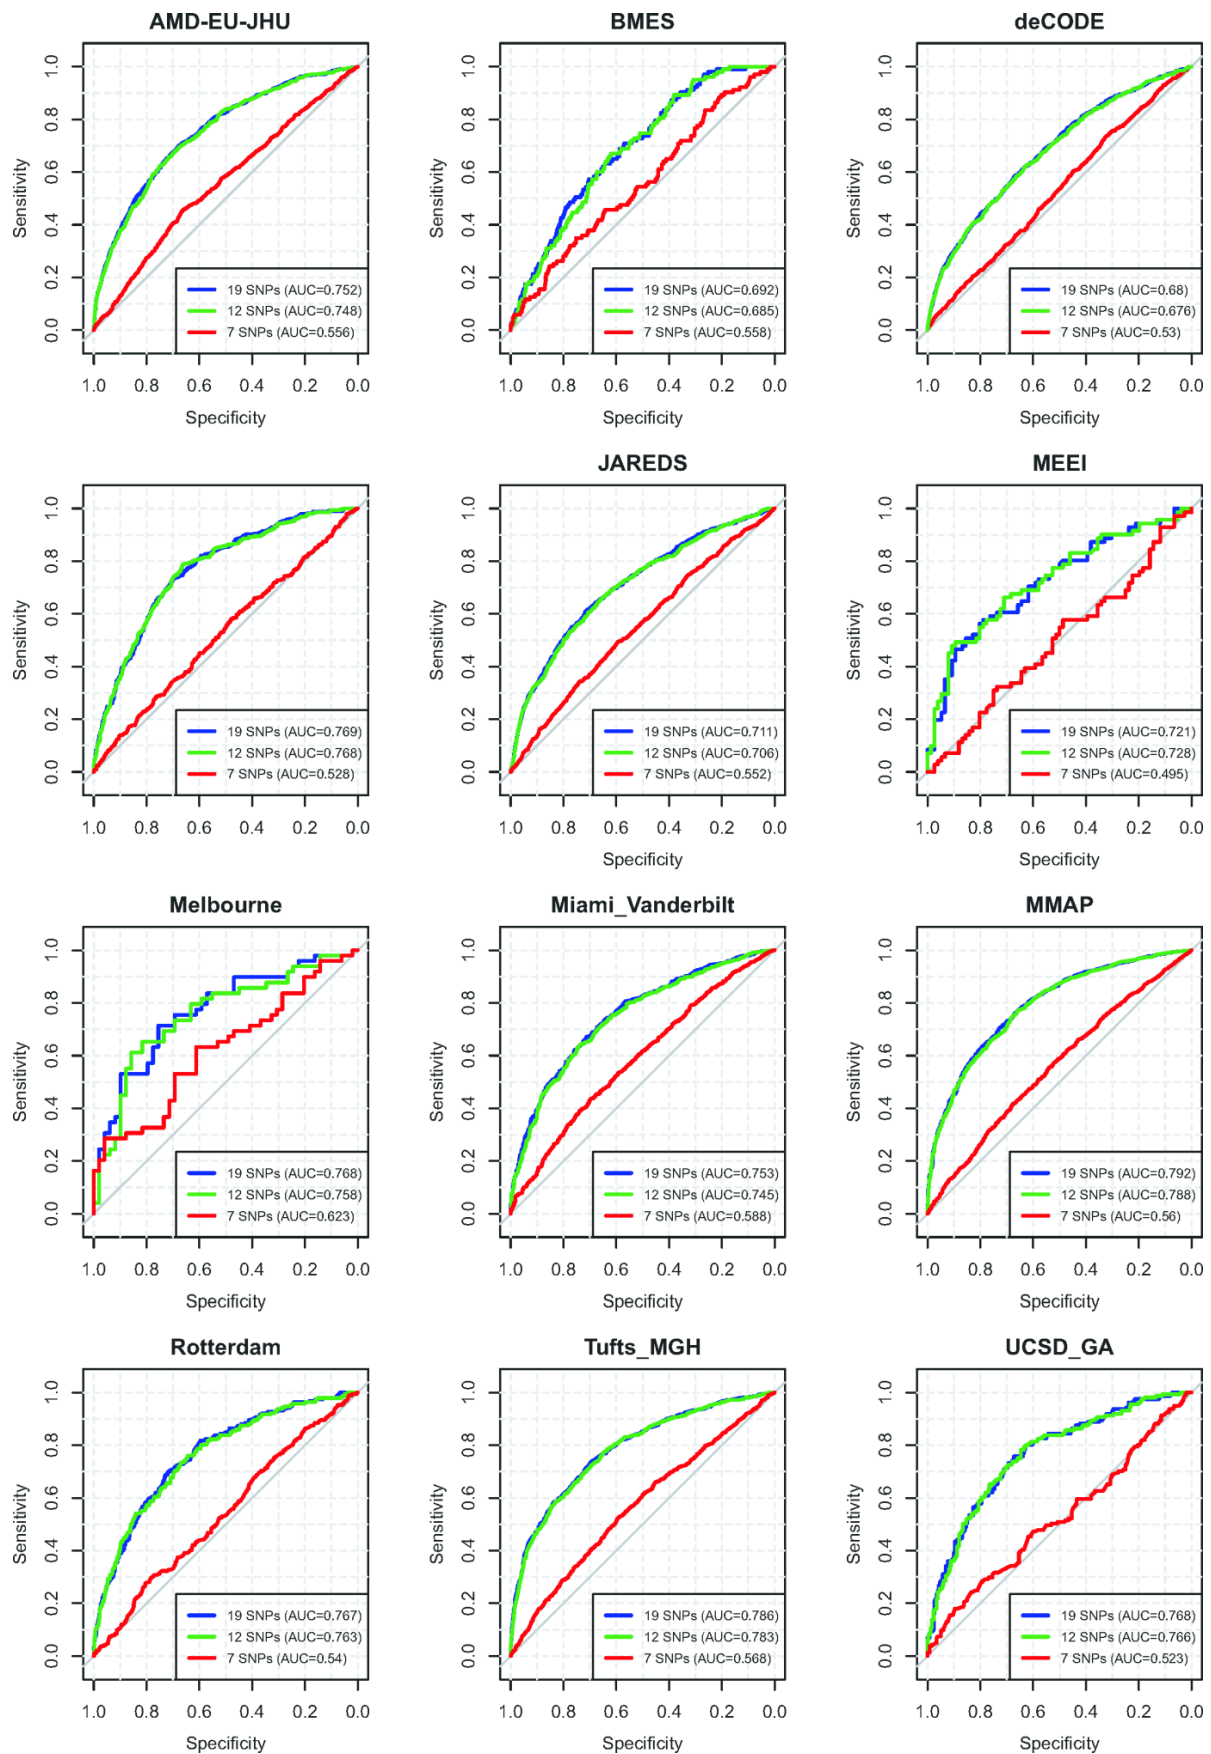

**SUPPLEMENTARY TABLE 1: Summary of samples contributing to GWAS meta-analysis and follow-up.**

| Studies                                                            | Cases            |          |        |        |                  | Controls           |          | Details in Supplementary Note # |
|--------------------------------------------------------------------|------------------|----------|--------|--------|------------------|--------------------|----------|---------------------------------|
|                                                                    | N                | % Female | %CNV   | %GA    | % Mixed (CNV/GA) | N                  | % Female |                                 |
| <b>Discovery Phase: Samples Contributing to GWAS Meta-Analysis</b> |                  |          |        |        |                  |                    |          |                                 |
| AMD-EU-JHU                                                         | 963 <sup>a</sup> | 62.9%    | 40.3%  | 43.1%  | 16.6%            | 4,262 <sup>a</sup> | 51.7%    | 1.                              |
| VRF (India)                                                        | 110              | 33.6%    | 90.0%  | 0.0%   | 10.0%            | 119                | 53.8%    | 2.                              |
| BMES                                                               | 103              | 64.1%    | 46.6%  | 39.8%  | 13.6%            | 1,052              | 55.7%    | 3.                              |
| UK Cambridge/Edinburgh 300k                                        | 150 <sup>a</sup> | 56.7%    | 72.0%  | 18.0%  | 10.0%            | 601 <sup>a</sup>   | 46.4%    | 4.                              |
| UK Cambridge/Edinburgh 550k                                        | 743 <sup>a</sup> | 55.0%    | 65.3%  | 20.9%  | 13.9%            | 1,598 <sup>a</sup> | 52.4%    | 4.                              |
| deCODE AMD                                                         | 721              | 32.5%    | 27.0%  | 27.9%  | 45.1%            | 33,463             | 42.2%    | 5.                              |
| FAS/KORA                                                           | 317              | 72.6%    | 45.7%  | 30.0%  | 24.3%            | 1,636              | 50.7%    | 6.                              |
| JAREDS                                                             | 827              | 30.5%    | 100.0% | 0.0%   | 0.0%             | 3,323              | 44.4%    | 7.                              |
| MEEI                                                               | 71               | 52.1%    | 100.0% | 0.0%   | 0.0%             | 76                 | 61.8%    | 8.                              |
| Melbourne                                                          | 49               | 63.3%    | 49.0%  | 42.9%  | 0.0%             | 49                 | 55.1%    | 9.                              |
| Miami/Vanderbilt                                                   | 867              | 63.3%    | 74.0%  | 17.1%  | 8.9%             | 689                | 55.6%    | 10.                             |
| MMAP                                                               | 1,464            | 61.5%    | 54.4%  | 28.8%  | 16.8%            | 1,150              | 55.9%    | 11.                             |
| Rotterdam                                                          | 192              | 60.4%    | 35.4%  | 41.7%  | 22.9%            | 1,887              | 56.5%    | 12.                             |
| Tufts/MGH                                                          | 912              | 55.5%    | 72.7%  | 27.3%  | 0.0%             | 1,679 <sup>b</sup> | 43.7%    | 13.                             |
| UCSD GA                                                            | 161              | 60.9%    | 0.0%   | 100.0% | 0.0%             | 260                | 75.8%    | 14.                             |

<sup>a</sup> Not included in age adjusted analysis, because age information was not available for most controls.

<sup>b</sup> 29.2% samples included in age adjusted analysis.

**SUPPLEMENTARY TABLE 1 (Continued): Summary of samples contributing to GWAS meta-analysis and follow-up.**

| Studies                                                                                      | Cases              |          |                    |                    |         | Controls         |          | Details in Supplementary Note # |
|----------------------------------------------------------------------------------------------|--------------------|----------|--------------------|--------------------|---------|------------------|----------|---------------------------------|
|                                                                                              | N                  | % Female | %CNV               | %GA                | % Mixed | N                | % Female |                                 |
| <b>Follow-Up Phase: Samples Contributing Genotyping Based Follow-up Of Promising Signals</b> |                    |          |                    |                    |         |                  |          |                                 |
| AMD-EU-JHU                                                                                   | 1,213 <sup>d</sup> | 62.2%    | 78.0%              | 21.3%              | 0.7%    | 385 <sup>d</sup> | 54.8%    | 15.                             |
| BDES                                                                                         | 138 <sup>d</sup>   | 65.2%    | 34.1% <sup>c</sup> | 37.0%              | 29.0%   | 932 <sup>d</sup> | 53.5%    | 16.                             |
| Oregon                                                                                       | 598 <sup>d</sup>   | 66.0%    | 65.0%              | 25.0%              | 10.0%   | 284 <sup>d</sup> | 54.0%    | 17.                             |
| Greece                                                                                       | 156                | 52.6%    | 89.7%              | 0.0%               | 10.3%   | 236              | 54.7%    | 18.                             |
| CCF/VAMC                                                                                     | 628                | 51.1%    | 64.5%              | 12.3%              | 23.2%   | 568              | 27.6%    | 19.                             |
| Columbia                                                                                     | 736 <sup>e</sup>   | 58.2%    | 69.4%              | 16.4%              | 14.1%   | 356 <sup>f</sup> | 55.9%    | 20.                             |
| Univ. of Pittsburgh/UCLA                                                                     | 1,176              | 62.5%    | 40.4%              | 19.1%              | 40.5%   | 224              | 53.6%    | 21.                             |
| Iowa                                                                                         | 763                | 66.7%    | 84.0%              | 10.5%              | 5.5%    | 562              | 58.7%    | 22.                             |
| Melbourne                                                                                    | 661                | 62.5%    | 77.0%              | 15.9%              | 7.1%    | 448              | 53.6%    | 23.                             |
| Miami/Vanderbilt                                                                             | 103                | 66.0%    | 65.0%              | 19.4% <sup>c</sup> | 15.5%   | 91               | 64.8%    | 24.                             |
| NESC                                                                                         | 338                | 62.1%    | 92.9%              | 0.0%               | 7.1%    | 209              | 58.4%    | 25.                             |
| NHS/HPFS                                                                                     | 164                | 54.3%    | 100.0%             | 0.0%               | 0.0%    | 1,344            | 65.2%    | 26.                             |
| MMAP/NEI                                                                                     | 769                | 58.4%    | 78.4%              | 14.0%              | 7.6%    | 699              | 59.8%    | 27.                             |
| SAGe                                                                                         | 122                | 32.8%    | 100.0%             | 0.0%               | 0.0%    | 151              | 46.4%    | 28.                             |
| SNUBH                                                                                        | 339                | 47.2%    | 89.4%              | 0.0%               | 10.6%   | 396              | 50.3%    | 29.                             |
| Southern Germany                                                                             | 1,136              | 63.6%    | 58.6%              | 20.5%              | 20.9%   | 1,054            | 58.6%    | 30.                             |
| UCSD GA                                                                                      | 152                | 52.0%    | 0.0%               | 100.0%             | 0.0%    | 135              | 57.0%    | 31.                             |
| Utah                                                                                         | 339                | 66.4%    | 72.0%              | 19.5%              | 8.6%    | 156              | 63.5%    | 32.                             |

<sup>d</sup> not included in age-adjusted analysis; <sup>e</sup> 92.8% of samples included in age-adjusted analysis; <sup>f</sup> 99.9% of samples included in age-adjusted analysis

**SUPPLEMENTARY TABLE 2: Genotyping and imputation methods.**

| Study                                   | Control Recruitment (Match Criteria)        | Genotyping Method / Platform                                                                        | Genotyping Analysis Software                 | Inclusion Criteria |                                                                               |                                | SNPs after QC | Imputation Software | SNPs in Meta-Analysis |
|-----------------------------------------|---------------------------------------------|-----------------------------------------------------------------------------------------------------|----------------------------------------------|--------------------|-------------------------------------------------------------------------------|--------------------------------|---------------|---------------------|-----------------------|
|                                         |                                             |                                                                                                     |                                              | MAF <sup>a</sup>   | Call Rate                                                                     | HWE <sup>b</sup>               |               |                     |                       |
| <b>GWAS</b>                             |                                             |                                                                                                     |                                              |                    |                                                                               |                                |               |                     |                       |
| AMD-EU-JHU                              | CEPH/Screened                               | Illumina HumanHap300 BeadChips or Illumina Human610-Quad BeadChips                                  | MACH2DAT                                     | ≥0.01              | ≥0.98                                                                         | >1×10 <sup>-6</sup>            | 259,814       | MACH v1.0           | 2,418,255             |
| Vision Research Foundation (VRF, India) | Screened                                    | Affymetrix 250K <i>Nspl</i>                                                                         | Logistic regression on allele dosage using R | ≥0.01              | ≥0.99 for SNPs with MAF <0.05; ≥0.97 for SNPs with MAF <0.10; ≥0.95 otherwise | >1×10 <sup>-6</sup>            | 167,658       | MaCH v1.0           | 1,663,272             |
| BMES (Blue Mountain Eye Study)          | Population Based                            | Illumina Human670-QuadCustom chip (as part of WTCCC2)                                               | ProbABEL                                     | >0.01              | ≥95%                                                                          | >1×10 <sup>-6</sup>            | 543,846       | MACH v1.0.16        | 2,437,732             |
| UK Cambridge / Edinburgh 300K           | Population based (geographic area)          | Cases: Illumina Infinium HumanHap300K BeadChip; Controls: Illumina Infinium HumanHap550v1 BeadChip  | R package snpStats                           | ≥0.05              | ≥0.975                                                                        | ≥1×10 <sup>-5</sup> (controls) | 286,135       | R package snpStats  | 2,244,198             |
| UK Cambridge / Edinburgh 550K           | Population based (geographic area)          | Cases: Illumina Infinium HumanHap550v3 BeadChip; Controls: Illumina Infinium HumanHap550v3 BeadChip | R package snpStats                           | ≥0.05              | ≥0.975                                                                        | ≥1×10 <sup>-5</sup> (controls) | 488,867       | R package snpStats  | 2,251,257             |
| deCODE AMD                              | Population based (same genotyping platform) | Illumina HumanHap300 or HumanHapCNV370 BeadChips                                                    | SNPTEST v2                                   | >0.01              | >0.96                                                                         | >1×10 <sup>-6</sup>            | 290,447       | IMPUTE v1           | 2,432,355             |
| FAS / KORA                              | Population based                            | Affymetrix GeneChip Human Mapping 250k Styl Array                                                   | SNPTEST v2.1.1                               | >0.01              | >0.90 for SNPs with MAF >0.1; (1-MAF) for SNPs with MAF ≤0.1                  | >1×10 <sup>-6</sup> (controls) | 165,770       | BEAGLE v3.1.0       | 2,055,179             |

| Study                    | Control Recruitment (Match Criteria) | Genotyping Method / Platform                                                 | Genotyping Analysis Software                | Inclusion Criteria |           |                                | SNPs after QC | Imputation Software | SNPs in Meta-Analysis |
|--------------------------|--------------------------------------|------------------------------------------------------------------------------|---------------------------------------------|--------------------|-----------|--------------------------------|---------------|---------------------|-----------------------|
|                          |                                      |                                                                              |                                             | MAF <sup>a</sup>   | Call Rate | HWE <sup>b</sup>               |               |                     |                       |
| JAREDS                   | Population based                     | Cases: Illumina 610-quad BeadChip; Controls: Illumina HumanHap550v3 BeadChip | MACH2DAT                                    | >0.01              | ≥0.99     | >1×10 <sup>-6</sup> (controls) | 457,489       | MACH v1.0           | 2,398,323             |
| MEEI                     | Screened (sibling of proband)        | Affymetrix 6.0                                                               | GEE as implemented in R                     | >0.02              | >0.98     | >1×10 <sup>-6</sup>            | 278,400       | MACH v1.0.16        | 2,040,787             |
| Melbourne                | Screened                             | Affymetrix 6.0                                                               | PLINK 1.04                                  | >0.01              | >0.95     | >1×10 <sup>-6</sup>            | 324,067       | MACH v1.0           | 2,386,948             |
| Miami/Vanderbilt         | Screened                             | Affymetrix 1M                                                                | Logistic regression as implemented in PLINK | >0.05              | ≥0.95     | >1×10 <sup>-6</sup>            | 668,238       | MACH v1.0.16        | 2,439,893             |
| MMAP                     | Screened                             | Illumina HumanCNV370v1                                                       | MACH2DAT                                    | ≥0.01              | ≥0.95     | >1×10 <sup>-6</sup>            | 324,067       | MACH v1.0           | 2,455,419             |
| Rotterdam                | Screened                             | Illumina Infinium II HumanHap550                                             | MACH2QTL                                    | >0.01              | >0.98     | >1×10 <sup>-5</sup>            | 486,261       | MACH v1.0           | 2,487,441             |
| Tufts / MGH              | Screened                             | Affymetrix 6.0                                                               | PLINK 1.07                                  | ≥0.01              | ≥0.98     | >1×10 <sup>-6</sup>            | 644,413       | BEAGLE              | 2,400,051             |
| UCSD GA                  | Screened                             | Cases: Illumina 660-Quad v1A; Controls: Illumina 610-Quad                    | Java                                        | >0.01              | >0.95     | >1×10 <sup>-6</sup>            | 383,363       | MACH v1.0.16        | 2,444,727             |
| <b>Follow-up Studies</b> |                                      |                                                                              |                                             |                    |           |                                |               |                     |                       |
| AMD-EU-JHU               | CEPH/screened                        | Sequenom                                                                     | Logistic regression as implemented in PLINK | ≥0.01              | ≥0.98     | >0.0013 (controls)             | 30            | n/a                 | 30                    |
| BDES                     | Screened                             | Kbiosciences (flouorescence based allele-specific PCR)                       | GEE as implemented in GWAF                  | >0.01              | ≥0.95     | >0.0013 (controls)             | 27            | n/a                 | 27                    |
| Oregon                   | Screened                             | Taqman                                                                       | Logistic regression as implemented in R     | >0.01              | >0.96     | >0.0013 (controls)             | 12            | n/a                 | 12                    |
| Greece                   | Screened                             | Sequenom                                                                     | Logistic regression as implemented in R     | >0.01              | >0.50     | >0.0013 (controls)             | 21            | n/a                 | 21                    |
| CCF / VAMC               | Screened                             | Taqman                                                                       | Logistic regression as implemented in PLINK | >0.01              | ≥0.95     | >0.0013 (controls)             | 27            | n/a                 | 27                    |
| Columbia                 | Screened                             | Taqman                                                                       | Logistic regression as implemented in PLINK | >0.01              | >0.50     | >0.0013 (controls)             | 29            | n/a                 | 29                    |

| Study                                                 | Control Recruitment (Match Criteria) | Genotyping Method / Platform                                                    | Genotyping Analysis Software                          | Inclusion Criteria |           |                    | SNPs after QC | Imputation Software | SNPs in Meta-Analysis |
|-------------------------------------------------------|--------------------------------------|---------------------------------------------------------------------------------|-------------------------------------------------------|--------------------|-----------|--------------------|---------------|---------------------|-----------------------|
|                                                       |                                      |                                                                                 |                                                       | MAF <sup>a</sup>   | Call Rate | HWE <sup>b</sup>   |               |                     |                       |
| Genetics of Age Related-Maculopathy (UCLA/Pittsburgh) | Screened                             | rs6499777, rs429608, and rs3130783: Taqman; remainder: Sequenom iPLEX MassArray | GEE as implemented in R                               | >0.01              | >0.50     | >0.0013 (controls) | 25            | n/a                 | 25                    |
| Iowa                                                  | Screened                             | Sequenom                                                                        | Logistic regression as implemented in R               | >0.01              | >0.50     | >0.0013 (controls) | 21            | n/a                 | 21                    |
| Melbourne                                             | Screened                             | Sequenom MassArray                                                              | Logistic regression as implemented in PLINK           | >0.01              | >0.50     | >0.0013 (controls) | 19            | n/a                 | 19                    |
| Miami / Vanderbilt                                    | Screened                             | Taqman                                                                          | Logistic regression as implemented in PLINK           | >0.01              | >0.50     | >0.0013 (controls) | 30            | n/a                 | 30                    |
| NESC                                                  | Screened (sibling of proband)        | Sequenom                                                                        | GEE as implemented in R                               | >0.01              | >0.50     | >0.0013 (controls) | 21            | n/a                 | 21                    |
| NHS / HPFS                                            | Screened                             | Sequenom                                                                        | Logistic regression as implemented in R               | >0.01              | >0.50     | >0.0013 (controls) | 21            | n/a                 | 21                    |
| MMAP / NEI                                            | Screened                             | Biotrove                                                                        | Logistic regression as implemented in R               | >0.01              | >0.5      | >0.0013 (controls) | 28            | n/a                 | 28                    |
| SAGE                                                  | Screened                             | Sequenom, Illumina Human610-Quad chip                                           | Logistic regression as implemented in SNPTTEST v2.1.1 | >0.05              | ≥0.95     | >0.0013 (controls) | 27            | n/a                 | 27                    |
| SNUBH                                                 | Screened                             | Sequenom iPLEX                                                                  | Logistic regression as implemented in R               | >0.01              | >0.50     | >0.0013 (controls) | 19            | n/a                 | 19                    |
| Southern Germany                                      | Screened                             | Sequenom MassARRAY                                                              | Logistic regression as implemented in PLINK           | >0.01              | >0.50     | >0.0013 (controls) | 29            | n/a                 | 29                    |
| UCSD GA                                               | Screened                             | Sequenom MassARRAY                                                              | Java                                                  | >0.01              | >0.50     | >0.0013 (controls) | 28            | n/a                 | 28                    |
| Utah                                                  | Screened                             | Sequenom                                                                        | Logistic regression as implemented in R               | >0.01              | >0.50     | >0.0013 (controls) | 21            | n/a                 | 21                    |

Note that, because features such as genotyping call rates, accuracy of rare allele genotypes, and the suitability of different methods to account for population stratification all depend on genotyping platform and other study specific features, quality filters necessarily vary between studies (as described in the table above).

<sup>a</sup>minor allele frequency; <sup>b</sup> p value for Hardy-Weinberg Equilibrium.

**SUPPLEMENTARY TABLE 3: Genotyped markers of the follow-up study.** 32 SNPs that revealed suggestive evidence ( $p < 10^{-6}$ ) in the primary discovery analysis were selected for follow-up genotyping. If the index SNP could not be genotyped, a highly correlated proxy ( $r^2 > 0.8$ ) was used with exception of SNP rs10981436 ( $r^2 = 0.33$ ) and SNP rs7499892 ( $r^2 = 0.72$ ).

| Index SNP  | Chr | Position (hg19) | Gene Label <sup>a</sup>      | Proxy ( $r^2$ )   | Genotyped SNPs per Study <sup>b</sup> |        |      |       |      |          |      |        |          |            |                          |           |                  |          |      |                  |          |         |   |   |     |
|------------|-----|-----------------|------------------------------|-------------------|---------------------------------------|--------|------|-------|------|----------|------|--------|----------|------------|--------------------------|-----------|------------------|----------|------|------------------|----------|---------|---|---|-----|
|            |     |                 |                              |                   | BDES                                  | Greece | Iowa | SNUBH | NESC | NHS/HPFS | Utah | Oregon | Columbia | AMD-EU-JHU | Univ. of Pittsburgh/UCLA | Melbourne | Miami/Vanderbilt | MMAP/NEI | SAGE | Southern Germany | CCF/VAMC | UCSD GA |   |   |     |
| rs10737680 | 1   | 196,679,455     | <i>CFH</i>                   | rs10922106 (1.0)  | X                                     | ...    | ...  | ...   | ...  | ...      | ...  | ...    | ...      | X          | X                        | X         | X                | X        | X    | X                | X        | X       | X | X | X   |
| rs12084515 | 1   | 233,058,437     | <i>NTPCR</i>                 | ...               | X                                     | X      | X    | X     | X    | X        | X    | ...    | X        | X          | X                        | X         | X                | X        | X    | ...              | X        | X       | X | X |     |
| rs6795735  | 3   | 64,705,365      | <i>ADAMTS9</i>               | ...               | X                                     | X      | X    | X     | X    | X        | X    | X      | X        | X          | X                        | X         | X                | X        | X    | X                | X        | X       | X | X | X   |
| rs13081855 | 3   | 99,481,539      | <i>COL8A1 / FILIP1L</i>      | ...               | X                                     | X      | X    | X     | X    | X        | X    | X      | X        | X          | ...                      | ...       | X                | X        | X    | X                | X        | X       | X | X | X   |
| rs2172734  | 3   | 107,549,462     | <i>BBX / LOC151658</i>       | rs9816888 (1.0)   | X                                     | ...    | ...  | ...   | ...  | ...      | ...  | ...    | X        | X          | X                        | ...       | P                | ...      | X    | X                | X        | X       | X | X | X   |
| rs4698775  | 4   | 110,590,479     | <i>PLA2G12A/CFI</i>          | rs4698770 (0.959) | X                                     | ...    | ...  | ...   | ...  | ...      | ...  | ...    | P        | X          | X                        | X         | ...              | P        | X    | X                | X        | X       | X | X | X   |
| rs1605677  | 5   | 35,600,210      | <i>SPEF2</i>                 | ...               | X                                     | X      | X    | ...   | X    | X        | X    | X      | X        | X          | ...                      | ...       | X                | X        | X    | X                | X        | X       | X | X | X   |
| rs318042   | 5   | 41,474,575      | <i>PLCXD3</i>                | rs318087 (0.983)  | X                                     | X      | X    | X     | X    | X        | X    | X      | X        | X          | X                        | X         | P                | X        | P    | X                | X        | X       | X | X | X   |
| rs4279337  | 5   | 124,284,656     | ...                          | ...               | X                                     | X      | X    | X     | X    | X        | X    | ...    | X        | X          | X                        | X         | X                | X        | X    | X                | X        | X       | X | X | X   |
| rs2863747  | 5   | 156,930,784     | <i>NIPAL4/ADAM19</i>         | ...               | X                                     | X      | X    | X     | X    | X        | X    | ...    | X        | X          | ...                      | X         | X                | X        | X    | X                | X        | X       | X | X | X   |
| rs3130783  | 6   | 30,774,357      | <i>IER3/DDR1</i>             | ...               | X                                     | X      | X    | X     | X    | X        | X    | ...    | X        | X          | X                        | X         | X                | X        | X    | X                | X        | X       | X | X | ... |
| rs429608   | 6   | 31,930,462      | <i>C2/CFB</i>                | ...               | X                                     | ...    | ...  | ...   | ...  | ...      | ...  | ...    | ...      | X          | X                        | X         | X                | X        | X    | X                | X        | X       | X | X | ... |
| rs943080   | 6   | 43,826,627      | <i>VEGFA / LOC100132354</i>  | rs1536304 (0.871) | X                                     | P      | P    | P     | P    | P        | P    | ...    | P        | X          | ...                      | X         | ...              | P        | X    | X                | X        | X       | X | X | X   |
| rs3812111  | 6   | 116,443,735     | <i>COL10A1</i>               | ...               | X                                     | X      | X    | X     | X    | X        | X    | X      | X        | X          | X                        | ...       | X                | X        | X    | X                | X        | X       | X | X | X   |
| rs11769700 | 7   | 100,090,049     | <i>C7orf51</i>               | ...               | X                                     | X      | X    | X     | X    | X        | X    | ...    | X        | X          | X                        | X         | X                | X        | ...  | X                | X        | X       | X | X | X   |
| rs13278062 | 8   | 23,082,971      | <i>TNFRSF10A / LOC389641</i> | ...               | X                                     | X      | X    | X     | X    | X        | X    | ...    | X        | X          | X                        | ...       | X                | X        | X    | X                | X        | X       | X | X | X   |
| rs334353   | 9   | 101,908,365     | <i>TGFBR1</i>                | ...               | X                                     | X      | X    | X     | X    | X        | X    | X      | X        | X          | X                        | X         | X                | X        | X    | X                | X        | X       | X | X | X   |



| Index SNP                             | Chr | Position (hg19) | Gene Label <sup>a</sup> | Proxy (r <sup>2</sup> ) | Genotyped SNPs per Study <sup>b</sup> |           |           |           |           |           |           |           |           |            |                          |           |                  |           |           |                  |           |           |
|---------------------------------------|-----|-----------------|-------------------------|-------------------------|---------------------------------------|-----------|-----------|-----------|-----------|-----------|-----------|-----------|-----------|------------|--------------------------|-----------|------------------|-----------|-----------|------------------|-----------|-----------|
|                                       |     |                 |                         |                         | BDES                                  | Greece    | Iowa      | SNUBH     | NESC      | NHS/HPFS  | Utah      | Oregon    | Columbia  | AMD-EU-JHU | Univ. of Pittsburgh/UCLA | Melbourne | Miami/Vanderbilt | MMAP/NEI  | SAGE      | Southern Germany | CCF/VAMC  | UCSD GA   |
| rs10981455                            | 9   | 115,367,155     | <i>KIAA1958</i>         | rs10981436 (0.331)      | X                                     | ...       | ...       | ...       | ...       | ...       | ...       | ...       | ...       | ...        | ...                      | X         | ...              | X         | P         | X                | ...       |           |
| rs10490924                            | 10  | 124,214,448     | <i>ARMS2 / HTRA1</i>    | rs3750847 (1.0)         | X                                     | ...       | ...       | ...       | ...       | ...       | ...       | ...       | X         | X          | X                        | X         | X                | P         | X         | X                | X         |           |
| rs6582128                             | 12  | 73,298,158      | ...                     | rs4760851 (1.0)         | X                                     | P         | P         | P         | P         | P         | P         | X         | P         | X          | X                        | P         | X                | X         | X         | X                | X         |           |
| rs9542236                             | 13  | 31,819,325      | <i>B3GALTL</i>          | ...                     | X                                     | X         | X         | X         | X         | X         | X         | X         | X         | X          | X                        | ...       | X                | X         | X         | X                | X         |           |
| rs11158950                            | 14  | 25,333,115      | <i>STXBP6</i>           | ...                     | ...                                   | X         | X         | X         | X         | X         | X         | ...       | X         | X          | X                        | ...       | X                | X         | X         | ...              | ...       |           |
| rs8017304                             | 14  | 68,785,077      | <i>RAD51B</i>           | ...                     | X                                     | X         | X         | X         | X         | X         | X         | X         | X         | X          | X                        | X         | X                | X         | X         | X                | X         |           |
| rs920915                              | 15  | 58,688,467      | <i>LIPC</i>             | rs443401 (0.88)         | ...                                   | ...       | ...       | ...       | ...       | ...       | ...       | ...       | X         | X          | X                        | ...       | P                | X         | X         | X                | ...       |           |
| rs6499777                             | 16  | 55,778,536      | <i>CES1P2</i>           | rs11862149 (1.0)        | ...                                   | X         | X         | X         | X         | X         | X         | ...       | X         | X          | X                        | P         | X                | X         | ...       | ...              | ...       |           |
| rs1864163                             | 16  | 56,997,233      | <i>CETP</i>             | rs7499892 (0.719)       | X                                     | ...       | ...       | ...       | ...       | ...       | ...       | ...       | X         | X          | ...                      | P         | X                | ...       | X         | X                | X         |           |
| rs9973159                             | 18  | 597,950         | <i>CLUL1</i>            | ...                     | X                                     | X         | X         | ...       | X         | X         | X         | X         | ...       | X          | X                        | X         | X                | X         | ...       | X                | X         |           |
| rs2230199                             | 19  | 6,718,387       | <i>C3</i>               | ...                     | X                                     | ...       | ...       | ...       | ...       | ...       | ...       | ...       | X         | X          | X                        | X         | X                | ...       | X         | X                | X         |           |
| rs4420638                             | 19  | 45,422,946      | <i>APOE</i>             | ...                     | ...                                   | X         | X         | X         | X         | X         | X         | ...       | X         | X          | ...                      | ...       | X                | ...       | X         | X                | ...       |           |
| rs9613841                             | 22  | 29,622,636      | <i>EMID1</i>            | ...                     | ...                                   | ...       | ...       | ...       | ...       | ...       | ...       | ...       | X         | X          | ...                      | ...       | X                | X         | ...       | X                | ...       |           |
| rs5749482                             | 22  | 33,059,665      | <i>TIMP3</i>            | ...                     | X                                     | ...       | ...       | ...       | ...       | ...       | ...       | ...       | X         | X          | X                        | ...       | X                | X         | X         | X                | X         |           |
| rs8135665                             | 22  | 38,476,276      | <i>SLC16A8</i>          | ...                     | X                                     | X         | X         | X         | X         | X         | X         | X         | X         | X          | X                        | X         | X                | X         | X         | X                | X         |           |
| <b>Total Number of Genotyped SNPs</b> |     |                 |                         |                         | <b>27</b>                             | <b>21</b> | <b>21</b> | <b>19</b> | <b>21</b> | <b>21</b> | <b>21</b> | <b>12</b> | <b>26</b> | <b>30</b>  | <b>25</b>                | <b>19</b> | <b>30</b>        | <b>28</b> | <b>27</b> | <b>29</b>        | <b>27</b> | <b>28</b> |

<sup>a</sup> Gene label: nearest gene or gene as published for identification. <sup>b</sup> X: Marker genotyped; P: Proxy genotyped

**SUPPLEMENTARY TABLE 4: Method for accounting for population structure and genomic control parameter for individual GWAS.** Prior to meta-analysis, statistics for each study were corrected using the genomic control method and the correction factor in the last column (except when  $\lambda_{GC} < 0$ , in which case no correction was applied).

| Study                            | Correction for Population Stratification |              | $\lambda_{GC}$<br>Before Genomic Control |
|----------------------------------|------------------------------------------|--------------|------------------------------------------|
|                                  | Software                                 | Method       |                                          |
| AMD-EU-JHU                       | EIGENSTRAT / EIGENSOFT                   | PCA, then GC | 1.063                                    |
| BMES                             | PLINK                                    | PCA, then GC | 0.995                                    |
| deCODE                           | Custom software                          | GC           | 1.167                                    |
| FAS/KORA                         | R                                        | GC           | 1.089                                    |
| JAREDS                           | Custom software                          | GC           | 1.174                                    |
| MEEI                             | R                                        | PCA, then GC | 1.012                                    |
| Melbourne                        | EIGENSTRAT / EIGENSOFT                   | PCA, then GC | 1.010                                    |
| Miami/Vanderbilt                 | EIGENSTRAT / EIGENSOFT                   | PCA, then GC | 1.028                                    |
| MMAP                             | EIGENSTRAT / EIGENSOFT                   | PCA, then GC | 1.057                                    |
| Rotterdam                        | Custom software                          | GC           | 1.039                                    |
| Tufts/MGH                        | PLINK                                    | PCA, then GC | 1.073                                    |
| UCSD GA                          | Java                                     | PCA, then GC | 1.108                                    |
| UK Cambridge /<br>Edinburgh 300k | R, R package snpStats                    | SA, then GC  | 1.026                                    |
| UK Cambridge /<br>Edinburgh 550k | R, R package snpStats                    | SA, then GC  | 1.024                                    |
| VRF (INDIA)                      | R                                        | GC           | 1.086                                    |

GC: Correction of Output Chi-Square and P-Values by Genomic Controls; PCA: Adjustment for Principal Components of Ancestry; SA: Stratified analysis by geographic origin: single SNP association evaluated using the Mantel extension of the 1-df trend test

**SUPPLEMENTARY TABLE 5: Full gene names for genes mapping near one of the 19 index SNPs reaching  $p < 5 \times 10^{-8}$**

| Index SNP  | Nearby Gene(s)     |                                                                        |                                       |
|------------|--------------------|------------------------------------------------------------------------|---------------------------------------|
|            | Symbol             | Name                                                                   | Distance to index SNP [kb] / Location |
| rs10490924 | <i>ARMS2</i>       | Age-related maculopathy susceptibility 2                               | 0 / coding sequence                   |
|            | <i>HTRA1</i>       | HtrA serine peptidase 1                                                | 6.6 / upstream                        |
| rs10737680 | <i>CFH</i>         | Complement factor H                                                    | 0 / intronic                          |
| rs429608   | <i>C2</i>          | Complement component 2                                                 | 17 / downstream                       |
|            | <i>CFB</i>         | Complement factor B                                                    | 10.6 / downstream                     |
|            | <i>SKIV2L</i>      | Superkiller viralicidic activity 2-like ( <i>S. cerevisiae</i> )       | 0 / intronic                          |
| rs2230199  | <i>C3</i>          | Complement component 3                                                 | 0 / coding sequence                   |
| rs5749482  | <i>TIMP3</i>       | TIMP metalloproteinase inhibitor 3                                     | 137.1 / upstream                      |
|            | <i>SYN3</i>        | Synapsin III                                                           | 0 / intronic                          |
| rs4420638  | <i>APOE</i>        | Apolipoprotein E                                                       | 10.3 / downstream                     |
|            | <i>APOC1</i>       | Apolipoprotein C-I                                                     | 5.0 / downstream                      |
| rs1864163  | <i>CETP</i>        | Cholesteryl ester transfer protein, plasma                             | 0 / intronic                          |
| rs943080   | <i>VEGFA</i>       | Vascular endothelial growth factor A                                   | 72.4 / downstream                     |
| rs13278062 | <i>TNFRSF10A</i>   | Tumor necrosis factor receptor superfamily, member 10a                 | 0.3 / upstream                        |
| rs920915   | <i>LIPC</i>        | Lipase, hepatic                                                        | 35.7 / upstream                       |
| rs4698775  | <i>CFI</i>         | Complement factor I                                                    | 71.4 / downstream                     |
|            | <i>CCDC109B</i>    | Coiled-coil domain containing 109B                                     | 0 / intronic                          |
| rs3812111  | <i>COL10A1</i>     | Collagen, type X, alpha 1                                              | 0 / intronic                          |
| rs13081855 | <i>COL8A1</i>      | Collagen, type VIII, alpha 1                                           | 0 / intronic                          |
| rs3130783  | <i>IER3</i>        | Immediate early response 3                                             | 62 / upstream                         |
|            | <i>DDR1</i>        | Discoidin domain receptor tyrosine kinase 1                            | 77.5 / upstream                       |
| rs8135665  | <i>SLC16A8</i>     | Solute carrier family 16, member 8 (monocarboxylic acid transporter 3) | 0 / intronic                          |
| rs334353   | <i>TGFBR1</i>      | Transforming growth factor, beta receptor 1                            | 0 / intronic                          |
| rs8017304  | <i>RAD51B</i>      | RAD51 homolog B ( <i>S. cerevisiae</i> )                               | 0 / intronic                          |
| rs6795735  | <i>ADAMTS9</i>     | ADAM metalloproteinase with thrombospondin type 1 motif, 9             | 32 / upstream                         |
|            | <i>ADAMTS9-AS2</i> | ADAMTS9 antisense RNA 2 (non-protein coding)                           | 0 / intronic                          |
|            | <i>MIR548A2</i>    | microRNA 548a-2                                                        | 0.3 / upstream                        |
| rs9542236  | <i>B3GALTL</i>     | Beta 1,3-galactosyltransferase-like                                    | 0 / intronic                          |

**SUPPLEMENTARY TABLE 6: Independently associated variants near identified loci.** We repeated our genome-wide association signal conditioning on the most significantly associated SNPs identified in the first round of analysis. The table summarizes signals peaking at  $p < .0002$  - corresponding to a Bonferroni adjustment for 250 independent tests in each locus and consistent with the average effective number of SNPs in the 1Mb intervals surrounding each of our original signals<sup>2</sup>.

| Index SNP  | Gene               | Chr. | Position (hg19) | Alleles | N <sub>cases</sub> | N <sub>controls</sub> | P-value               | r <sup>2</sup> w/lead SNP | D' w/lead SNP | Distance (kb) to lead SNP |
|------------|--------------------|------|-----------------|---------|--------------------|-----------------------|-----------------------|---------------------------|---------------|---------------------------|
| rs12045503 | <i>CFH</i>         | 1    | 196,672,473     | t/c     | 7,488              | 51,549                | $8.6 \times 10^{-55}$ | 0.41                      | 1.00          | 7.0                       |
| rs9469060  | <i>C2/CFB</i>      | 6    | 31,804,715      | a/t     | 5,698              | 45,962                | $2.2 \times 10^{-10}$ | 0.03                      | 0.60          | 125.7                     |
| rs11569520 | <i>C3</i>          | 19   | 6,689,507       | a/g     | 6,501              | 47,972                | $1.8 \times 10^{-5}$  | 0.03                      | 0.88          | 28.9                      |
| rs3764261  | <i>CETP</i>        | 16   | 56,993,324      | a/c     | 7,417              | 51,425                | $4.7 \times 10^{-6}$  | 0.15                      | 1.00          | 3.9                       |
| rs572410   | <i>LIPC</i>        | 15   | 58,741,384      | c/g     | 7,488              | 51,522                | $8.4 \times 10^{-6}$  | <0.01                     | 0.15          | 52.9                      |
| rs12203852 | <i>FRK/COL10A1</i> | 6    | 116,206,371     | t/c     | 7,489              | 51,552                | $1.3 \times 10^{-4}$  | 0.09                      | 0.42          | 237.4                     |
| rs9262558  | <i>IER3/DDR1</i>   | 6    | 31,006,994      | t/c     | 5,296              | 45,971                | $5.8 \times 10^{-7}$  | <0.01                     | 0.43          | 232.6                     |
| rs2842344  | <i>RAD51B</i>      | 14   | 68,976,971      | t/c     | 7,172              | 49,915                | $1.5 \times 10^{-6}$  | <0.01                     | 0.22          | 191.9                     |

**SUPPLEMENTARY TABLE 7: Non-synonymous coding variants in strong linkage disequilibrium with AMD susceptibility alleles.** The table lists all coding variants genotyped in the 1000 Genomes Project data and in strong linkage disequilibrium ( $r^2 > 0.60$ ) with the index SNP for one of our association signals. Where available, association test results at the coding SNP are also listed (some coding SNPs were not part of our imputation reference panel and thus not tested). An analysis of coding variants genotyped by the International HapMap Consortium did not identify additional coding variants in strong linkage disequilibrium with our association signals.

| Index SNP                        | <i>P</i><br>(Index SNP) | Chr | Position<br>[hg19] | Coding SNP | <i>P</i><br>(Coding SNP) | Distance to<br>Index SNP<br>[kb] | Gene<br>Symbol  | Exon | Sequence change         | Amino acid<br>change | $r^2$<br>1000G<br>EUR<br>(N=379) | PolyPhen<br>Prediction |
|----------------------------------|-------------------------|-----|--------------------|------------|--------------------------|----------------------------------|-----------------|------|-------------------------|----------------------|----------------------------------|------------------------|
| <b>Primary Discover Analysis</b> |                         |     |                    |            |                          |                                  |                 |      |                         |                      |                                  |                        |
| rs4698775                        | $2 \times 10^{-10}$     | 4   | 110,590,479        | rs13846    | $2 \times 10^{-9}$       | 15.3                             | <i>CCDC109B</i> | 6    | NM_017918.4:c.758A>T    | p.Tyr253Phe          | 0.89                             | Possibly Damaging      |
| rs3812111                        | $7 \times 10^{-8}$      | 6   | 116,443,735        | rs1064583  | $5 \times 10^{-7}$       | 2.8                              | <i>COL10A1</i>  | 2    | NM_000493.3:c.80T>C     | p.Met27Thr           | 0.99                             | -                      |
| rs10490924                       | $4 \times 10^{-353}$    | 10  | 124,214,448        | rs10490924 | $4 \times 10^{-353}$     | 0.0                              | <i>ARMS2</i>    | 1    | NM_001099667.1:c.205G>T | p.Ala69Ser           | 1.00                             | Benign                 |
| rs2230199                        | $2 \times 10^{-16}$     | 19  | 6,718,387          | rs1047286  | not tested               | 5.1                              | <i>C3</i>       | 9    | NM_000064.2:c.941C>T    | p.Pro314Leu          | 0.83                             | Benign                 |
|                                  |                         |     |                    | rs2230199  | $2 \times 10^{-16}$      | 0.0                              | <i>C3</i>       | 3    | NM_000064.2:c.304C>G    | p.Arg102Gly          | 1.00                             | Benign                 |
| rs4420638                        | $3 \times 10^{-15}$     | 19  | 45,422,946         | rs429358   | not tested               | 11.0                             | <i>APOE</i>     | 4    | NM_000041.2:c.388T>C    | p.Cys130Arg          | 0.63                             | Benign                 |
| <b>Secondary Signal Analysis</b> |                         |     |                    |            |                          |                                  |                 |      |                         |                      |                                  |                        |
| rs12045503                       | $9 \times 10^{-55}$     | 1   | 196672473          | rs1061170  | $2 \times 10^{-47}$      | 13.2                             | <i>CFH</i>      | 9    | NM_000186.3:c.1204C>T   | p.His402Tyr          | 1.00                             | Benign                 |
| rs9469060                        | $2 \times 10^{-10}$     | 6   | 31804715           | rs36038685 | not tested               | 125.0                            | <i>SKIV2L</i>   | 10   | NM_006929.4:c.970C>T    | p.Arg324Trp          | 0.88                             | Possibly Damaging      |
|                                  |                         |     |                    | rs11531    | $2 \times 10^{-8}$       | 54.2                             | <i>VARS</i>     | 15   | NM_006295.2:c.1876C>T   | p.Pro626Ser          | 0.66                             | Benign                 |

**SUPPLEMENTARY TABLE 8: Gene expression analysis.** Retina expression is derived from high throughput and high quality RNA-sequencing data from three young (17-35 yrs age) and two old (75-77 yrs age) human retina. Expression is presented as fragments per kilobase of exon per million fragments mapped (FPKM) value and is highly quantitative (see Brooks<sup>3</sup> for methods and analysis). Low-level expression of retinal genes (such as rhodopsin) in RPE data likely represents photoreceptor contamination. Median normalized signal intensities were computed and signal intensity of >6 was taken as cutoff for expression in microarray data. For comparisons of expression levels, we calculated the log of ratios of estimated RPKM expression levels (for RNA-sequencing data) or of hybridization intensities (for microarray data). These log-ratios were approximately normally distributed with mean zero and evidence for differential expression was evaluated by converting these log-ratios to z-scores (by dividing each by their corresponding standard deviation).

| Index SNP  | Gene Symbol     | RefSeq Transcript Id | Chr. | Gene Position (hg19) |             | RNA Seq      |            | Microarray   |           |           |
|------------|-----------------|----------------------|------|----------------------|-------------|--------------|------------|--------------|-----------|-----------|
|            |                 |                      |      | Start                | End         | Young Retina | Old Retina | Probe_set id | Adult RPE | Fetal RPE |
| rs10737680 | <i>CFH</i>      | NM_000186            | 1    | 196,621,007          | 196,716,634 | *            | 2.58       | 213800_at    | 4.82      | 2.06      |
|            | <i>CFHR1</i>    | NM_002113            | 1    | 196,788.86           | 196,801.32  | *            | *          | 215388_s_at  | 7.01      | 4.05      |
|            | <i>CFHR3</i>    | NM_001166624         | 1    | 196,743,929          | 196,763,203 | *            | *          |              | **        | **        |
| rs6795735  | <i>ADAMTS9</i>  | NM_182920            | 3    | 64,501,330           | 64,673,365  | *            | *          | 220287_at    | 0.84      | 0.47      |
|            | <i>MIR548A2</i> | NR_030317            | 3    | 64,705,682           | 64,941,858  | *            | *          |              | **        | **        |
| rs13081855 | <i>MIR548G</i>  | NR_031662            | 3    | 99,273,152           | 99,717,059  | *            | *          |              | **        | **        |
|            | <i>COL8A1</i>   | NM_020351            | 3    | 99,357,453           | 99,515,158  | *            | *          | 214587_at    | 0.56      | 6.24      |
|            | <i>C3orf26</i>  | NM_032359            | 3    | 99,536,677           | 99,897,476  | 16.12        | 14.56      |              | **        | **        |
|            | <i>FILIP1L</i>  | NM_182909            | 3    | 99,551,987           | 99,833,349  | *            | *          | 204135_at    | 1.14      | 0.53      |
| rs4698775  | <i>SEC24B</i>   | NM_001042734         | 4    | 110,354.97           | 110,461.62  | 13.85        | 14.69      | 202798_at    | 9.76      | 15.40     |
|            | <i>CCDC109B</i> | NM_017918            | 4    | 110,481,354          | 110,608,872 | 4.13         | 3.38       | 218802_at    | 1.34      | 1.05      |
|            | <i>CASP6</i>    | NM_032992            | 4    | 110,609,784          | 110,624,629 | 2.35         | *          | 209790_s_at  | 0.91      | 2.08      |
|            | <i>PLA2G12A</i> | NM_030821            | 4    | 110,631,144          | 110,651,242 | 8.68         | 8.51       | 221027_s_at  | 2.9       | 2.91      |
|            | <i>CFI</i>      | NM_000204            | 4    | 110,661,847          | 110,723,335 | 14.98        | 20.74      | 203854_at    | 10.27     | 7.1       |
| rs3130783  | <i>MDC1</i>     | NM_014641            | 6    | 30,667,583           | 30,685,458  | 13.25        | 11.01      | 203061_s_at  | 1.2       | 1.98      |
|            | <i>TUBB</i>     | NM_178014            | 6    | 30,688,156           | 30,693,195  | 81.64        | 102.69     | 209026_x_at  | 11.83     | 50.94     |
|            | <i>FLOT1</i>    | NM_005803            | 6    | 30,695,510           | 30,710,453  | 39.82        | 41.32      | 213819_s_at  | 0.41      | 0.41      |
|            | <i>FLOT1</i>    | NM_005803            | 6    | 30,695,510           | 30,710,453  | 39.82        | 41.32      | 208749_x_at  | 7.37      | 10.41     |
|            | <i>IER3</i>     | NM_003897            | 6    | 30,710,975           | 30,712,327  | 4.61         | 2.94       | 201631_s_at  | 4.18      | 9.34      |
|            | <i>DDR1</i>     | NM_001954            | 6    | 30,851,860           | 30,867,933  | 25.34        | 31.89      | 1007_s_at    | 3.1       | 6.32      |
|            | <i>GTF2H4</i>   | NM_001517            | 6    | 30,875,976           | 30,881,880  | 10.97        | 8.06       | 203577_at    | 0.38      | 1.04      |
|            | <i>VAR2</i>     | NM_001167733         | 6    | 30,882,107           | 30,894,235  | 10.12        | 8.02       |              | **        | **        |

| Index SNP   | Gene Symbol         | RefSeq Transcript Id | Chr.       | Gene Position (hg19) |             | RNA Seq      |             | Microarray   |           |           |
|-------------|---------------------|----------------------|------------|----------------------|-------------|--------------|-------------|--------------|-----------|-----------|
|             |                     |                      |            | Start                | End         | Young Retina | Old Retina  | Probe_set id | Adult RPE | Fetal RPE |
| rs429608    | <i>NEU1</i>         | NM_000434            | 6          | 31,826,828           | 31,830,709  | 17.22        | 14.9        | 208926_at    | 3.65      | 9.65      |
|             | <i>SLC44A4</i>      | NM_001178044         | 6          | 31,830,969           | 31,846,823  | *            | *           | 205597_at    | 0.14      | 0.26      |
|             | <i>EHMT2</i>        | NM_006709            | 6          | 31,847,536           | 31,865,464  | 18.21        | 15.5        | 202326_at    | 1.66      | 5.12      |
|             | <i>ZBTB12</i>       | NM_181842            | 6          | 31,867,393           | 31,869,769  | 5.79         | 6.04        |              | **        | **        |
|             | <i>C2</i>           | NM_000063            | 6          | 31,895,265           | 31,913,449  | *            | *           | 203052_at    | 1.08      | 0.26      |
|             | <i>CFB</i>          | NM_001710            | 6          | 31,913,720           | 31,919,861  | *            | *           | 202357_s_at  | 0.71      | 0.06      |
|             | <i>RDBP</i>         | NM_002904            | 6          | 31,919,863           | 31,926,864  | 23.64        | 21.66       | 209219_at    | 2.17      | 9.07      |
|             | <i>MIR1236</i>      | NR_031601            | 6          | 31,924,615           | 31,924,717  | *            | *           |              | **        | **        |
|             | <i>SKIV2L</i>       | NM_006929            | 6          | 31,926,580           | 31,937,532  | 9.58         | 7.7         | 203727_at    | 2.41      | 2.71      |
|             | <i>DOM3Z</i>        | NM_005510            | 6          | 31,937,587           | 31,940,032  | 14.92        | 12.45       | 215982_s_at  | 1.24      | 2.11      |
|             | <i>STK19</i>        | NR_026717            | 6          | 31,938,951           | 31,949,223  | 10.72        | 8.9         | 204090_at    | 1.83      | 2.65      |
|             | <i>C4A</i>          | NM_007293            | 6          | 31,949,833           | 31,970,457  | 5.95         | 11.34       | 208451_s_at  | 14.49     | 2.45      |
|             | <i>C4B</i>          | NM_001002029         | 6          | 31,949,833           | 31,970,458  | 4.84         | 9.79        | 208451_s_at  | 14.49     | 2.45      |
|             | <i>CYP21A2</i>      | NM_001128590         | 6          | 31,973,358           | 31,976,712  | *            | *           | 214622_at    | 0.16      | 0.07      |
|             | <i>TNXA</i>         | NR_001284            | 6          | 31,976,196           | 31,980,800  | *            | *           | 208609_s_at  | 0.28      | 0.09      |
| <i>TNXB</i> | NM_032470           | 6                    | 31,976,196 | 31,981,050           | *           | *            | 206093_x_at | 0.62         | 0.2       |           |
| rs943080    | <i>VEGFA</i>        | NM_001171626         | 6          | 43,737,945           | 43,754,223  | 67.21        | 173.17      | 210512_s_at  | 10.6      | 25.16     |
|             | <i>LOC100132354</i> | NR_024478            | 6          | 43,858,764           | 43,905,944  | *            | *           |              | **        | **        |
| rs3812111   | <i>FRK</i>          | NM_002031            | 6          | 116,262,692          | 116,381,921 | *            | *           | 207178_s_at  | 0.41      | 0.11      |
|             | <i>TPI1P3</i>       | NR_027338            | 6          | 116,359,893          | 116,361,107 | *            | *           |              | **        | **        |
|             | <i>NT5DC1</i>       | NM_152729            | 6          | 116,421,998          | 116,566,853 | 5.82         | 6.2         |              | **        | **        |
|             | <i>COL10A1</i>      | NM_000493            | 6          | 116,440,084          | 116,447,296 | *            | *           | 205941_s_at  | 0.67      | 0.2       |
|             | <i>TSPYL4</i>       | NM_021648            | 6          | 116,571,130          | 116,575,261 | 18.56        | 16.92       | 212928_at    | 7.06      | 19.3      |
| rs13278062  | <i>TNFRSF10D</i>    | NM_003840            | 8          | 22,993,103           | 23,021,540  | *            | *           | 210654_at    | 0.13      | 0.13      |
|             | <i>TNFRSF10A</i>    | NM_003844            | 8          | 23,048,969           | 23,082,680  | *            | *           |              | **        | **        |
|             | <i>LOC389641</i>    | NR_033928            | 8          | 23,082,733           | 23,088,439  | *            | *           |              | **        | **        |
|             | <i>CHMP7</i>        | NM_152272            | 8          | 23,101,149           | 23,119,512  | 7.98         | 6.85        | 212313_at    | 1.73      | 3.03      |
|             | <i>R3HCC1</i>       | NM_001136108         | 8          | 23,145,611           | 23,153,792  | 68.71        | 60.16       | 212866_at    | 4.67      | 5.88      |
|             | <i>LOXL2</i>        | NM_002318            | 8          | 23,154,409           | 23,261,722  | 2.62         | 2.3         |              | **        | **        |
| rs334353    | <i>COL15A1</i>      | NM_001855            | 9          | 101,706,137          | 101,833,068 | *            | *           | 203477_at    | 0.88      | 8.12      |

| Index SNP  | Gene Symbol    | RefSeq Transcript Id | Chr. | Gene Position (hg19) |             | RNA Seq      |            | Microarray   |           |           |
|------------|----------------|----------------------|------|----------------------|-------------|--------------|------------|--------------|-----------|-----------|
|            |                |                      |      | Start                | End         | Young Retina | Old Retina | Probe_set id | Adult RPE | Fetal RPE |
|            | <i>TGFBFR1</i> | NM_004612            | 9    | 101,867,411          | 101,916,473 | *            | *          | 206943_at    | 0.28      | 0.18      |
|            | <i>ALG2</i>    | NR_024532            | 9    | 101,978,706          | 101,984,246 | 6.6          | 6.21       |              | **        | **        |
|            | <i>SEC61B</i>  | NM_006808            | 9    | 101,984,569          | 101,992,901 | 35.34        | 35.8       | 203133_at    | 15.02     | 37.67     |
| rs10490924 | <i>PLEKHA1</i> | NM_021622            | 10   | 124,151,818          | 124,191,871 | 7.76         | 7.71       | 219024_at    | 1.71      | 3.27      |
|            | <i>MIR3941</i> | NR_037506            | 10   | 124,176,480          | 124,176,583 | *            | *          |              | **        | **        |
|            | <i>ARMS2</i>   | NM_001099667         | 10   | 124,214,178          | 124,216,868 | *            | *          |              | **        | **        |
|            | <i>HTRA1</i>   | NM_002775            | 10   | 124,221,040          | 124,274,424 | 135.47       | 163.06     | 201185_at    | 28.88     | 28.84     |
|            | <i>DMBT1</i>   | NM_007329            | 10   | 124,320.18           | 124,403.25  | *            | *          | 208250_s_at  | 0.89      | 0.40      |
| rs9542236  | <i>HSPH1</i>   | NM_006644            | 13   | 31,710,762           | 31,736,117  | 12.24        | 8.94       | 206976_s_at  | 5.74      | 15.72     |
|            | <i>B3GALTL</i> | NM_194318            | 13   | 31,774,111           | 31,906,411  | 5.57         | 4.5        |              | **        | **        |
| rs8017304  | <i>RAD51B</i>  | NM_133509            | 14   | 68,286,495           | 69,062,738  | *            | *          | 210255_at    | 0.32      | 0.23      |
| rs920915   | <i>LIPC</i>    | NM_000236            | 15   | 58,724,174           | 58,861,073  | *            | *          | 206606_at    | 0.05      | 0.05      |
| rs1864163  | <i>SLC12A3</i> | NM_001126107         | 16   | 56,899,118           | 56,949,762  | *            | *          | 208354_s_at  | 0.34      | 0.15      |
|            | <i>HERPUD1</i> | NM_001010990         | 16   | 56,965,747           | 56,977,793  | 22.56        | 18.53      | 217168_s_at  | 10.56     | 14.16     |
|            | <i>CETP</i>    | NM_000078            | 16   | 56,995,834           | 57,017,756  | *            | *          | 206210_s_at  | 0.09      | 0.09      |
|            | <i>NLRC5</i>   | NM_032206            | 16   | 57,023,409           | 57,117,436  | *            | *          |              | **        | **        |
| rs2230199  | <i>TNFSF14</i> | NM_172014            | 19   | 6,663,147            | 6,670,599   | *            | *          | 207907_at    | 0.06      | 0.03      |
|            | <i>C3</i>      | NM_000064            | 19   | 6,677,845            | 6,720,662   | 3.28         | 5.25       | 217767_at    | 13.19     | 0.11      |
|            | <i>GPR108</i>  | NM_001080452         | 19   | 6,729,924            | 6,737,633   | 39.01        | 31.95      |              | **        | **        |
|            | <i>TRIP10</i>  | NM_004240            | 19   | 6,739,706            | 6,751,529   | 18.52        | 18.89      | 202734_at    | 3.38      | 2.95      |
|            | <i>SH2D3A</i>  | NM_005490            | 19   | 6,752,172            | 6,767,523   | 2.23         | *          | 219513_s_at  | 0.67      | 0.2       |
|            | <i>VAV1</i>    | NM_005428            | 19   | 6,772,721            | 6,857,371   | *            | *          | 206219_s_at  | 0.6       | 0.16      |
| rs4420638  | <i>BCAM</i>    | NM_005581            | 19   | 45,312,337           | 45,324,678  | 3.31         | 4.07       | 203009_at    | 0.65      | 1.14      |
|            | <i>PVRL2</i>   | NM_001042724         | 19   | 45,349,392           | 45,392,485  | 8.23         | 8.46       | 203149_at    | 2.53      | 4.01      |
|            | <i>TOMM40</i>  | NM_006114            | 19   | 45,394,476           | 45,406,946  | 18.45        | 19.34      | 202264_s_at  | 2.55      | 2.1       |
|            | <i>APOE</i>    | NM_000041            | 19   | 45,409,038           | 45,412,650  | 66.9         | 99.1       | 203381_s_at  | 4.34      | 14.41     |
|            | <i>APOC1</i>   | NM_001645            | 19   | 45,417,920           | 45,422,606  | 7.57         | 13.43      | 213553_x_at  | 2.57      | 8.23      |
|            | <i>APOC1P1</i> | NR_028413            | 19   | 45,430,059           | 45,434,643  | *            | *          |              | **        | **        |
|            | <i>APOC4</i>   | NM_001646            | 19   | 45,445,494           | 45,448,753  | *            | *          | 206738_at    | 0.58      | 0.35      |
|            | <i>APOC2</i>   | NM_000483            | 19   | 45,449,238           | 45,452,822  | *            | *          | 204561_x_at  | 0.24      | 0.07      |



| Index SNP                   | Gene Symbol               | RefSeq Transcript Id | Chr.        | Gene Position (hg19) |             | RNA Seq      |             | Microarray   |           |           |
|-----------------------------|---------------------------|----------------------|-------------|----------------------|-------------|--------------|-------------|--------------|-----------|-----------|
|                             |                           |                      |             | Start                | End         | Young Retina | Old Retina  | Probe_set id | Adult RPE | Fetal RPE |
|                             | <i>CLPTM1</i>             | NM_001199468         | 19          | 45,458,598           | 45,496,604  | 44.7         | 39.59       | 201640_x_at  | 3         | 2.3       |
|                             | <i>RELB</i>               | NM_006509            | 19          | 45,504,706           | 45,541,456  | *            | *           | 205205_at    | 0.61      | 0.17      |
| rs5749482                   | <i>SYN3</i>               | NM_001135774         | 22          | 32,908,539           | 33,454,377  | *            | *           | 206322_at    | 0.15      | 0.14      |
|                             | <i>TIMP3</i>              | NM_000362            | 22          | 33,196,802           | 33,259,028  | 3.39         | 2.17        | 201147_s_at  | 29.05     | 30.63     |
| rs8135665                   | <i>SOX10</i>              | NM_006941            | 22          | 38,368,318           | 38,380,539  | *            | *           | 209842_at    | 5.44      | 13.09     |
|                             | <i>SOX10</i>              | NM_006941            | 22          | 38,368,318           | 38,380,539  | *            | *           | 209843_s_at  | 0.57      | 0.78      |
|                             | <i>PICK1</i>              | NM_001039583         | 22          | 38,453,261           | 38,471,708  | 9.66         | 8.14        | 204746_s_at  | 1.04      | 0.85      |
|                             | <i>SLC16A8</i>            | NM_013356            | 22          | 38,474,143           | 38,479,170  | *            | *           | 220455_at    | 8.64      | 32.47     |
|                             | <i>BAIAP2L2</i>           | NM_025045            | 22          | 38,480,895           | 38,506,676  | 2.23         | 2.5         | 221178_at    | 0.17      | 0.11      |
|                             | <i>PLA2G6</i>             | NM_003560            | 22          | 38,507,501           | 38,577,761  | 10.88        | 8.14        | 204691_x_at  | 1.9       | 1.91      |
| Genes unrelated to AMD Loci | <i>RHO<sup>a</sup></i>    | NM_000539            | 3           | 129,247,482          | 129,254,187 | 5544.14      | 5287.43     | 206455_s_at  | 8.58      | 0.29      |
|                             | <i>GNAT1<sup>a</sup></i>  | NM_144499            | 3           | 50,229,043           | 50,235,129  | 1360.75      | 1302.89     | 207514_s_at  | 3.04      | 0.04      |
|                             | <i>PRPH2<sup>a</sup></i>  | NM_000322            | 6           | 42,664,333           | 42,690,358  | 365.58       | 432.19      | 206625_at    | 12.49     | 0.22      |
|                             | <i>PDE6H<sup>a</sup></i>  | NM_006205            | 12          | 15,125,956           | 15,134,799  | 602.75       | 529.56      | 206841_at    | 11.61     | 0.15      |
|                             | <i>RPE65<sup>b</sup></i>  | NM_000329            | 1           | 68,894,507           | 68,915,642  | 7.7          | 5.27        | 207107_at    | 101.71    | 85.28     |
|                             | <i>BEST1<sup>b</sup></i>  | NM_001139443         | 11          | 61,717,356           | 61,731,935  | 2.38         | 2.66        | 207671_s_at  | 80.03     | 145.93    |
|                             | <i>COL8A2<sup>b</sup></i> | NM_005202            | 1           | 36,560,842           | 36,565,850  | *            | *           | 221900_at    | 1.87      | 31.15     |
|                             | <i>GAPDH<sup>c</sup></i>  | NM_002046            | 12          | 6,643,657            | 6,647,536   | 1774.34      | 2450.83     | 212581_x_at  | 123.31    | 134.33    |
|                             | <i>ATF4<sup>c</sup></i>   | NM_001675            | 22          | 39,916,569           | 39,918,691  | 367.02       | 280.22      | 200779_at    | 42        | 29.94     |
| <i>HSP90AA1<sup>c</sup></i> | NM_001017963              | 14                   | 102,547,075 | 102,606,086          | 777.99      | 837.2        | 214328_s_at | 140.13       | 137.67    |           |

\* represents the genes with FPKM values less than 2 (i.e., low/negligible expression). Human fetal and adult RPE data is derived from Strunnikova et al. *Hum Mol Genet.* 19:2468-2486, 2010; GEO accession number GSE18811. Expression values represented are median normalized signal intensities. Signal intensity of >6 is taken as cutoff for expression in microarray data. \*\* represents the gene for which either no expression was detected or didn't have probe set id in the chip. Expression values of 10 other genes (unrelated to AMD loci) are included for comparison: <sup>A</sup> =Retina-specific gene, <sup>b</sup> =RPE-specific gene and <sup>c</sup> =housekeeping genes.

**SUPPLEMENTARY TABLE 9: Genes in pathway analysis.** Genes within 100kb of a SNP in high LD ( $r^2 > 0.8$ ) with one of our replicated signals were flagged as potential AMD disease genes and considered for subsequent pathway enrichment analyses.

| Index SNP   | Gene Symbol         | Chr       | Position [kb] (hg19) |            | Distance to Index SNP [kb] |
|-------------|---------------------|-----------|----------------------|------------|----------------------------|
|             |                     |           | Start                | End        |                            |
| rs10737680  | <i>CFH</i>          | 1         | 196,621.01           | 196,716.63 | 0                          |
|             | <i>CFHR3</i>        | 1         | 196,743.93           | 196,763.20 | 64.48                      |
|             | <i>CFHR1</i>        | 1         | 196,788.86           | 196,801.32 | 109.41                     |
| rs6795735   | <i>ADAMTS9</i>      | 3         | 64,501.33            | 64,673.37  | 32.00                      |
|             | <i>MIR548A2</i>     | 3         | 64,705.68            | 64,941.86  | 0.32                       |
| rs13081855  | <i>MIR548G</i>      | 3         | 99,273.15            | 99,717.06  | 0                          |
|             | <i>COL8A1</i>       | 3         | 99,357.45            | 99,515.16  | 0                          |
|             | <i>C3orf26</i>      | 3         | 99,536.68            | 99,897.48  | 55.14                      |
|             | <i>FILIP1L</i>      | 3         | 99,551.99            | 99,833.35  | 70.45                      |
| rs4698775   | <i>SEC24B</i>       | 4         | 110,354.97           | 110,461.62 | 128.86                     |
|             | <i>CCDC109B</i>     | 4         | 110,481.35           | 110,608.87 | 0                          |
|             | <i>CASP6</i>        | 4         | 110,609.78           | 110,624.63 | 19.31                      |
|             | <i>PLA2G12A</i>     | 4         | 110,631.14           | 110,651.24 | 40.67                      |
|             | <i>CFI</i>          | 4         | 110,661.85           | 110,723.34 | 71.37                      |
| rs3130783   | <i>MDC1</i>         | 6         | 30,667.58            | 30,685.46  | 88.898                     |
|             | <i>TUBB</i>         | 6         | 30,688.16            | 30,693.20  | 81.161                     |
|             | <i>FLOT1</i>        | 6         | 30,695.51            | 30,710.45  | 63.90                      |
|             | <i>IER3</i>         | 6         | 30,710.98            | 30,712.33  | 62.03                      |
|             | <i>DDR1</i>         | 6         | 30,851.86            | 30,867.93  | 77.50                      |
|             | <i>GTF2H4</i>       | 6         | 30,875.98            | 30,881.88  | 101.619                    |
|             | <i>VAR2</i>         | 6         | 30,881.98            | 30,894.24  | 107.75                     |
| rs429608    | <i>NEU1</i>         | 6         | 31,826.83            | 31,830.71  | 99.752                     |
|             | <i>SLC44A4</i>      | 6         | 31,830.97            | 31,846.82  | 83.64                      |
|             | <i>EHMT2</i>        | 6         | 31,847.54            | 31,865.46  | 65.00                      |
|             | <i>ZBTB12</i>       | 6         | 31,867.39            | 31,869.77  | 60.692                     |
|             | <i>C2</i>           | 6         | 31,895.27            | 31,913.45  | 17.01                      |
|             | <i>CFB</i>          | 6         | 31,913.72            | 31,919.86  | 10.60                      |
|             | <i>RDBP</i>         | 6         | 31,919.86            | 31,926.86  | 3.60                       |
|             | <i>MIR1236</i>      | 6         | 31,924.62            | 31,924.72  | 5.74                       |
|             | <i>SKIV2L</i>       | 6         | 31,926.58            | 31,937.53  | 0                          |
|             | <i>DOM3Z</i>        | 6         | 31,937.59            | 31,940.03  | 7.13                       |
|             | <i>STK19</i>        | 6         | 31,938.95            | 31,949.22  | 8.49                       |
|             | <i>C4A</i>          | 6         | 31,949.83            | 31,970.46  | 19.37                      |
|             | <i>C4B</i>          | 6         | 31,949.83            | 31,970.46  | 19.37                      |
|             | <i>CYP21A2</i>      | 6         | 31,973.36            | 31,976.71  | 42.90                      |
|             | <i>TNXA</i>         | 6         | 31,976.20            | 31,980.80  | 45.74                      |
| <i>TNXB</i> | 6                   | 31,976.20 | 31,981.05            | 45.74      |                            |
| rs943080    | <i>VEGFA</i>        | 6         | 43,737.95            | 43,754.22  | 72.40                      |
|             | <i>LOC100132354</i> | 6         | 43,858.76            | 43,905.94  | 32.14                      |
| rs3812111   | <i>FRK</i>          | 6         | 116,262.69           | 116,381.92 | 61.81                      |
|             | <i>TPI1P3</i>       | 6         | 116,359.89           | 116,361.11 | 82.63                      |
|             | <i>NT5DC1</i>       | 6         | 116,422.00           | 116,566.85 | 0                          |
|             | <i>COL10A1</i>      | 6         | 116,440.08           | 116,447.30 | 0                          |
|             | <i>TSPYL4</i>       | 6         | 116,571.13           | 116,575.26 | 127.395                    |

| Index SNP  | Gene Symbol      | Chr | Position [kb] (hg19) |            | Distance to Index SNP [kb] |
|------------|------------------|-----|----------------------|------------|----------------------------|
|            |                  |     | Start                | End        |                            |
| rs13278062 | <i>TNFRSF10D</i> | 8   | 22,993.10            | 23,021.54  | 61.43                      |
|            | <i>TNFRSF10A</i> | 8   | 23,048.97            | 23,082.68  | 0.29                       |
|            | <i>LOC389641</i> | 8   | 23,082.73            | 23,088.44  | 0                          |
|            | <i>CHMP7</i>     | 8   | 23,101.15            | 23,119.51  | 18.18                      |
|            | <i>R3HCC1</i>    | 8   | 23,145.61            | 23,153.79  | 62.64                      |
|            | <i>LOXL2</i>     | 8   | 23,154.41            | 23,261.72  | 71.44                      |
| rs334353   | <i>COL15A1</i>   | 9   | 101,706.14           | 101,833.07 | 75.30                      |
|            | <i>TGFBR1</i>    | 9   | 101,867.41           | 101,916.47 | 0                          |
|            | <i>ALG2</i>      | 9   | 101,978.71           | 101,984.25 | 70.34                      |
|            | <i>SEC61B</i>    | 9   | 101,984.57           | 101,992.90 | 76.21                      |
| rs10490924 | <i>PLEKHA1</i>   | 10  | 124,151.82           | 124,191.87 | 22.58                      |
|            | <i>MIR3941</i>   | 10  | 124,176.48           | 124,176.58 | 37.86                      |
|            | <i>ARMS2</i>     | 10  | 124,214.18           | 124,216.87 | 0                          |
|            | <i>HTRA1</i>     | 10  | 124,221.04           | 124,274.42 | 6.59                       |
|            | <i>DMBT1</i>     | 10  | 124,320.18           | 124,403.25 | 105.73                     |
| rs9542236  | <i>HSPH1</i>     | 13  | 31,710.76            | 31,736.12  | 83.21                      |
|            | <i>B3GALTL</i>   | 13  | 31,774.11            | 31,906.41  | 0                          |
| rs8017304  | <i>RAD51L1</i>   | 14  | 68,286.50            | 69,062.74  | 0                          |
| rs920915   | <i>LIPC</i>      | 15  | 58,724.17            | 58,861.07  | 35.71                      |
| rs1864163  | <i>SLC12A3</i>   | 16  | 56,899.12            | 56,949.76  | 47.47                      |
|            | <i>HERPUD1</i>   | 16  | 56,965.75            | 56,977.79  | 19.44                      |
|            | <i>CETP</i>      | 16  | 56,995.83            | 57,017.76  | 0                          |
|            | <i>NLRC5</i>     | 16  | 57,023.41            | 57,117.44  | 26.18                      |
| rs2230199  | <i>TNFSF14</i>   | 19  | 6,663.15             | 6,670.60   | 47.79                      |
|            | <i>C3</i>        | 19  | 6,677.85             | 6,720.66   | 0                          |
|            | <i>GPR108</i>    | 19  | 6,729.92             | 6,737.63   | 11.54                      |
|            | <i>TRIP10</i>    | 19  | 6,739.71             | 6,751.53   | 21.32                      |
|            | <i>SH2D3A</i>    | 19  | 6,752.17             | 6,767.52   | 33.79                      |
|            | <i>VAV1</i>      | 19  | 6,772.72             | 6,857.37   | 54.34                      |
| rs4420638  | <i>BCAM</i>      | 19  | 45,312.34            | 45,324.68  | 98.27                      |
|            | <i>PVRL2</i>     | 19  | 45,349.39            | 45,392.49  | 30.46                      |
|            | <i>TOMM40</i>    | 19  | 45,394.48            | 45,406.95  | 16.00                      |
|            | <i>APOE</i>      | 19  | 45,409.04            | 45,412.65  | 10.30                      |
|            | <i>APOC1</i>     | 19  | 45,417.92            | 45,422.61  | 0.34                       |
|            | <i>APOC1P1</i>   | 19  | 45,430.06            | 45,434.64  | 7.11                       |
|            | <i>APOC4</i>     | 19  | 45,445.49            | 45,448.75  | 22.55                      |
|            | <i>APOC2</i>     | 19  | 45,449.24            | 45,452.82  | 26.29                      |
|            | <i>CLPTM1</i>    | 19  | 45,458.60            | 45,496.60  | 35.65                      |
|            | <i>RELB</i>      | 19  | 45,504.71            | 45,541.46  | 81.76                      |
| rs5749482  | <i>SYN3</i>      | 22  | 32,908.54            | 33,454.38  | 0                          |
|            | <i>TIMP3</i>     | 22  | 33,196.80            | 33,259.03  | 137.14                     |
| rs8135665  | <i>SOX10</i>     | 22  | 38,368.32            | 38,380.54  | 95.74                      |
|            | <i>PICK1</i>     | 22  | 38,453.26            | 38,471.71  | 4.57                       |
|            | <i>SLC16A8</i>   | 22  | 38,474.14            | 38,479.17  | 0                          |
|            | <i>BAIAP2L2</i>  | 22  | 38,480.90            | 38,506.68  | 4.62                       |
|            | <i>PLA2G6</i>    | 22  | 38,507.50            | 38,577.76  | 31.23                      |

**Index SNP** = Replicated AMD associated SNP; **Gene Symbol** = HUGO Gene ID; **Chr**=Chromosome; **Start/End** = Chromosomal position [kb] of start/end of gene; **Distance to Index SNP**= Distance from index SNP to end or start of gene depending on whether the gene is upstream or downstream of the index SNP, respectively.

**SUPPLEMENTARY TABLE 10. INRICH Pathway Analysis.** Enriched gene sets with corrected P-value < .10 of the analyzed gene set databases (C2:CP, C5:BP, C5:CC, and C5:MF) are shown. Intervals were defined by the 19 index SNPs +/- 100kb.

| Gene Set Source | Gene Set Description                     | Gene Set Size | Overlapping Genes In AMD Loci | Empirical P-value    | Corrected P-value    |
|-----------------|------------------------------------------|---------------|-------------------------------|----------------------|----------------------|
| c2:cp           | KEGG Complement and Coagulation Cascades | 68            | 4                             | $1.6 \times 10^{-4}$ | 0.027                |
| c2:cp           | Reactome Lipoprotein Metabolism          | 27            | 3                             | $2.6 \times 10^{-4}$ | 0.041                |
| c5:bp           | Regulation of Apoptosis                  | 335           | 6                             | $6.4 \times 10^{-4}$ | 0.092                |
| c5:bp           | Regulation of Programmed Cell Death      | 336           | 6                             | $6.4 \times 10^{-4}$ | 0.092                |
| c5:cc           | Collagen                                 | 23            | 4                             | $1.0 \times 10^{-5}$ | $6.0 \times 10^{-4}$ |
| c5:cc           | Extracellular Matrix                     | 100           | 5                             | $4.0 \times 10^{-5}$ | 0.0022               |
| c5:cc           | Extracellular Matrix Part                | 57            | 4                             | $4.0 \times 10^{-5}$ | 0.0022               |
| c5:cc           | Extracellular Region                     | 437           | 11                            | $1.0 \times 10^{-5}$ | $6.0 \times 10^{-4}$ |
| c5:cc           | Extracellular Region Part                | 330           | 10                            | $1.0 \times 10^{-5}$ | $6.0 \times 10^{-4}$ |
| c5:cc           | Extracellular Space                      | 237           | 6                             | $4.5 \times 10^{-4}$ | 0.016                |
| c5:cc           | Proteinaceous Extracellular Matrix       | 98            | 5                             | $4.0 \times 10^{-5}$ | 0.0022               |
| c5:mf           | Phospholipid Binding                     | 40            | 3                             | $9.3 \times 10^{-4}$ | 0.070                |

**SUPPLEMENTARY TABLE 11: Interaction analysis between the 171 pairs of the 19 index SNPs.** Nominally significant SNP pairs ( $p < .05$ ) are shown.

| Index SNP A | Gene Label A | Index SNP B | Gene Label B       | N <sub>cases</sub> | N <sub>controls</sub> | Interaction Effect OR | Interaction P-value  | Interaction Direction** |
|-------------|--------------|-------------|--------------------|--------------------|-----------------------|-----------------------|----------------------|-------------------------|
| rs10737680  | <i>CFH</i>   | rs429608    | <i>C2 / CFB</i>    | 6,645              | 49,367                | 1.25                  | $5.2 \times 10^{-5}$ | ---++++-++++            |
| rs10490924  | <i>ARMS2</i> | rs5749482   | <i>TIMP3</i>       | 6,645              | 49,395                | 1.15                  | 0.0052               | -+++++---++++           |
| rs5749482   | <i>TIMP3</i> | rs920915    | <i>LIPC</i>        | 6,645              | 49,401                | 0.89                  | 0.011                | ---+---+-----           |
| rs1864163   | <i>CETP</i>  | rs6795735   | <i>ADAMTS9</i>     | 6,524              | 49,244                | 1.11                  | 0.021                | +?++++?-----            |
| rs4698775   | <i>CFI</i>   | rs920915    | <i>LIPC</i>        | 6,327              | 47,618                | 0.92                  | 0.022                | +--+?-----              |
| rs10490924  | <i>ARMS2</i> | rs10737680  | <i>CFH</i>         | 6,645              | 49,395                | 1.09                  | 0.025                | -++--++-+++-            |
| rs5749482   | <i>TIMP3</i> | rs3130783   | <i>IER3 / DDR1</i> | 6,645              | 49,399                | 1.12                  | 0.034                | -++-+-++-++-            |
| rs920915    | <i>LIPC</i>  | rs9542236   | <i>B3GALT1</i>     | 5,818              | 46,078                | 0.93                  | 0.038                | -----+?-----            |
| rs2230199   | <i>C3</i>    | rs5749482   | <i>TIMP3</i>       | 5,219              | 44,032                | 0.85                  | 0.041                | +?--??-?-----?          |

\*For the interaction analysis, an OR>1 implies that individuals carrying risk alleles at both loci are at greater risk of disease than expected assuming a log-additive model for risk. An OR<1 implies that individuals carrying risk alleles at both loci are at lesser risk of disease than expected assuming a log-additive model for risk.

\*\*Plus and minus signs indicate the estimated direction of effect in each study, ordered as follows: BMES, MEEI, deCODE, AMD-EU-JHU, FAS/KORA, JAREDS, Melbourne, Miami/Vanderbilt, MMAP, Rotterdam, Tufts/MGH, UCSD GA. Question marks indicate exclusion of a study due to missing SNP genotypes, extreme effect sizes and/or standard errors.

## SUPPLEMENTARY NOTE

### GWAS Datasets

All participating GWAS studies were reviewed and approved by local Institutional Review Boards. In addition, subjects gave informed consent prior to enrollment.

#### 1. AMD-EU-JHU

##### 1.1. Baltimore

Cases: All participants were enrolled by the Wilmer Eye Institute in Baltimore. Grading was carried out with a classification system similar to that established by AREDS<sup>4</sup>. Diagnosis of advanced AMD was based on the presence of advanced GA or CNV shown in the submitted stereoscopic color fundus photos. When both GA and CNV were present, the patient was graded as CNV. Intermediate AMD and Early AMD were the same as the AREDS classifications. Patients were also graded as to the certainty of the diagnosis- 100% or less than 100%. Attempts were made to obtain additional follow up photos for all patients for whom certainty was less than 100% or they were at an intermediate or early stage to update diagnoses. Once a patient reached advanced CNV or GA with 100% certainty, no additional photos were obtained and the diagnosis was considered final. This study was approved by the Institutional Review Boards of the Johns Hopkins University. Subjects gave informed consent prior to participation.

##### 1.2. Bonn

Cases: Early AMD, late AMD was defined according to the criteria of the ARM Epidemiological Study Group<sup>5</sup>. Patients below the age 55 years were excluded. Exclusion criteria included any systemic disease known to affect the complement system (e.g. rheumatoid arthritis) ascertained by a standardized case report form derived from the multicenter Fundus Autofluorescence in AMD (FAM) study<sup>6</sup>. Digital fundus photographs were obtained from all participants. In patients with CNV, optical coherence tomography and fluorescein angiography were performed. Fundus autofluorescence imaging was performed in patients with GA due to AMD. All fundus images were evaluated separately by two independent readers.

##### 1.3. Créteil

Cases: Enrolled prospectively at the Department of Ophthalmology at the Hôpital intercommunal de Créteil. Eligible subjects were affected with CNV in one eye and early age-related maculopathy (any drusen or reticular pseudodrusen with or without pigmentary changes) in the fellow eye (not affected by CNV at entry). Inclusion criteria were as follows: 1) age  $\geq$  55 and  $<$  85 years, 2) signed informed consent, 3) visual acuity  $\geq$  +0.4 LogMAR units in the study eye, and 4) subjects likely to attend follow-up visits during the study period.

The main exclusion criteria were as follows: 1) CNV in both eyes or no CNV in any eye, 2) wide central atrophy encroaching on the fovea of the study eye, 3) progressive ocular diseases (severe glaucoma or other severe retinopathy), 4) corneal or lens opacities precluding retinal evaluation, 5) anticoagulant therapy or bleeding tendency and 6) subjects not covered by the French National Health system or wards of court. The study was reviewed and approved by the relevant IRB (Comité de Protection des Personnes, Paris-Ile de France 5, Paris, France).

#### **1.4. Evry**

Controls: Population-based controls were obtained from an anonymized genotype database maintained at the centre d'étude du polymorphisme humain (CEPH). Controls were matched to case samples in the selection based on principal component scores.

#### **1.5. London**

Cases: All subjects were of Caucasian descent and were recruited at the Moorfields Eye Hospital in London. Color stereoscopic fundus photography of the macular region with grading of the photographs according to the International Classification System for age-related maculopathy (ICARMS)<sup>5</sup> classification by 2 trained readers independently with any discrepancies being resolved by an ophthalmologist. Cases were excluded if they had retino-choroidal inflammatory disease, diabetic retinopathy, branch retinal vein or artery occlusion or any other cause of visual loss other than amblyopia. The ophthalmic examination included Snellen acuity, slit-lamp examination and biomicroscopic funduscopy. Auto-fluorescence images were taken of the macula and fluorescein angiography was performed when choroidal neovascularisation was suspected. For patients presenting with visual dysfunction in the second eye, retrospective data was gathered from hospital records concerning previous acuities. Moreover, any color images or fluorescein images relating to previous visual loss were located from the hospital archive.

Controls: Examined in a similar fashion to cases and excluded if drusen > 63 µm was evident, or other signs of age-related maculopathy such as GA. Controls were recruited from spouses or friends of cases, or were from local residential homes for the elderly within 8 km of the hospital. Each participant was interviewed specifically for the study, and a family history, smoking history and other medical history was taken.

#### **1.6. Paris**

Cases: Patients were recruited from the Centre Hospitalier National d'Ophthalmologie des Quinze-Vingts à Paris. Grading was carried out with the classification established by AREDS<sup>4</sup>. Digital fundus photographs were obtained from all participants. All images were digitized. Classification was performed by two ophthalmologists. Participants underwent a clinical examination which included visual acuity measurements, color fundus photography, auto-fluorescence imaging and optical coherence tomography. Fluorescein angiography was performed when CNV was suspected.

#### **1.7. Southampton**

Cases: Aged older than 55 years, of European descent and ascertained through the Southampton Eye Unit or research clinics undertaken by Andrew Lotery in Guernsey. Classified on the basis of the AREDS classification system<sup>7</sup>.

Controls: Same as cases.

## **2. Vision Research Foundation (VRF, India)**

Cases: All cases and controls were of southern Indian ancestry and were aged more than 50 years. AMD was graded using the modified AREDS classification system<sup>8</sup> from fundus photographs. In addition, all subjects underwent a complete ophthalmic examination including recording of the best-corrected visual acuity, subjective refraction, slit-lamp examination, applanation tonometry, binocular indirect ophthalmoscopy and stereoscopic evaluation of disc and macula using the +78 D lens. A 30-degree macula-centered color photograph was taken for each eye after pharmacologic

mydriasis with tropicamide 0.5% and phenylephrine 5%. The Zeiss FF450-plus fundus camera with VISUPAC digital image archiving system (Carl Zeiss, Jena, Germany) was used.

Controls: Control subjects were recruited through the ongoing Chennai Glaucoma epidemiology study<sup>9</sup>. Control subjects had no sign of AMD, in form of drusen or RPE abnormalities.

Study references: Sivakumaran *et al.* 2011, Vijaya *et al.* 2008

### **3. BMES (Blue Mountains Eye Study)**

The BMES is a population-based cohort study of older Australians, aged 49+ years at baseline. Over 98% of 3654 baseline and 1174 BMES extension study participants had 6-field retinal photographs taken of both eyes. Retinal photographs were assessed for AMD lesions following the International Classification and Grading System for AMD. Definitions of early and late AMD closely followed the Wisconsin Age-Related Maculopathy Grading System.<sup>10</sup>

Cases: Early AMD: Presence of large soft indistinct drusen (>125 µm) or reticular drusen alone, RPE depigmentation or increased retinal pigment in combination with large soft distinct drusen in the absence of late AMD. Late AMD: Presence of neovascular AMD (CNV) or pure geographic atrophy (GA). If GA and neovascular ARM were present in the same eye or the same person but different eyes, neovascular ARM was considered the diagnosis for the eye or the person.

Controls: No soft (distinct or indistinct) or intermediate drusen, any retinal pigment abnormalities (either depigmentation or increased pigment), and no signs of early or late AMD. Controls may have hard drusen.

Study references: Bird *et al.* 1995, Klein *et al.* 1991, Mitchell *et al.* 1995, Mitchell *et al.* 2002, Wang *et al.* 2007

### **4. UK Cambridge/Edinburgh Study**

Cases: Selected from existing Cambridge and Edinburgh AMD case-control sample collections<sup>14</sup>. All cases had at least one eye affected by CNV and/or GA. For subjects genotyped using the 300k platform, preference was given to cases with early onset. Cambridge cases were recruited from ophthalmic clinics in London, the South East of England and the North West of England between 2002 and 2006<sup>14</sup>. All subjects described themselves as “white” rather than “other” on a recruitment questionnaire. Subjects were examined by an ophthalmologist and had colour, stereoscopic fundus photography of the macular region. The images were graded at the Reading Centre, Moorfields Eye Hospital, London using the International Classification of Age-related Maculopathy and Macular Degeneration<sup>5</sup>. The majority of the Edinburgh cases were recruited from ophthalmic clinics in Edinburgh, Dundee and Inverness between 2004 and 2006 and the remainder came from the 1921 Lothian Birth Cohort<sup>15</sup>. All subjects were examined by an ophthalmologist and had colour, stereoscopic fundus photography of the macular region. Images were graded by an ophthalmologist working on the study using the International Classification of Age-related Maculopathy and Macular Degeneration<sup>5</sup>; for validation 100 cases and controls were independently graded at the Moorfields Reading Centre.

Controls: Genotyping data was obtained from the British 1958 Birth Cohort (58BC)<sup>16,17</sup>. For cases genotyped using the 300k platform, controls matched by geographic area were selected from the 58BC subjects used in the Wellcome Trust Case Control Consortium study<sup>18</sup>. For cases genotyped



using the 550k platform, controls matched by geographic area were selected from the 58BC subjects genotyped as controls for the Type 1 Diabetes Genetics Consortium (T1DGC) study<sup>16</sup>.

Study references: Bird *et al.* 1995, Yates *et al.* 2007, Deary *et al.* 2004, Barrett *et al.* 2009, Power and Elliott 2006, Wellcome Trust Case Control Consortium 2007, Cipriani *et al.* 2012

## **5. deCODE AMD**

Cases: Probands were recruited from a list of patients diagnosed with AMD or early AMD at the University Eye Clinic, Reykjavik, or listed in the Icelandic Registry for the Blind during the years 1980-2001, together with their relatives. The AMD cases used in the study went through a standard examination protocol and visual-acuity measurements<sup>21</sup>.

Controls: Selected among individuals that have participated in various genetic studies at deCODE genetics and that had been genotyped with the same Illumina chips.

Study references: Magnusson *et al.* 2006.

## **6. Frankonian AMD study (FAS) / Kooperative Gesundheitsforschung in der Region Augsburg (KORA) Study**

Cases: All AMD patients were examined by trained ophthalmologists. Stereo fundus photographs were graded according to standardized classification systems<sup>5</sup> with minor modifications due to the application of 50° digital fundus images and the inclusion of HRA-AF and infrared reflectance images for the evaluation of geographic atrophy and reticular drusen.

Case subphenotypes: Based on the grading of the worse eye (early AMD < GA or NV < Mixed NV/GA).

Controls: Population based without diagnosis based on the KORA platform

Study references: Rivera *et al.* 2005, Holle *et al.* 2005

## **7. JAREDS (Japanese Age Related Eye Disease Study)**

Cases: All AMD cases were diagnosed by comprehensive ophthalmic examination. We classified exudative AMD into 4 subtypes under the established criteria (see references). We did not include dry type AMD.

Controls: For the control subjects, we used genome-wide screening data of BioBank Japan samples, which consists of 2,421 individuals with thirteen diseases and 902 healthy volunteers recruited from Osaka-Midousuji Rotary Club, Osaka, Japan. All control individuals had not had a recent eye examination.

Study references: Arakawa *et al.* 2011, Nakamura 2007

## **8. MEEI (Massachusetts Eye and Ear Institute) Sibpairs**

Cases: All subjects included in this analysis were of Caucasian descent and were recruited from the Retina Service of the Massachusetts Eye and Ear Infirmary in Boston, MA and Associated Retina Consultants at the William Beaumont Hospital in Royal Oak, MI. All probands were at least 50 years of age and had CNV in at least one eye. CNV cases were diagnosed via evaluation of fundus photographs or fluorescein angiograms, and defined as having subretinal hemorrhage, fibrosis, or fluorescein angiographic presence of neovascularization either prior to or at the time of enrollment in the study. Cases were excluded if individuals had any signs of pathologic myopia, presumed ocular

histoplasmosis syndrome, angioid streaks, choroidal rupture, any hereditary retinal diseases other than AMD, previous laser treatment due to retinal conditions other than AMD, and/or if retinal pigment epithelium detachment was the only exudative finding present, as this may not represent definite CNV.

Controls: Controls were excluded if there was evidence of large drusen (>63 µm in diameter), greater than 5 small drusen (<63 µm in diameter), pigment abnormalities, and/or neovascularization or other forms of AMD such as GA. Controls were recruited from siblings of probands and must have had a confirmed diagnosis of normal macula at an age greater than the affected sibling's recorded age of onset for CNV. Disease status of every participant was typically verified by at least 2 investigators, except in instances when an unaffected sibling had to be evaluated by a single investigator during a home visit.

Study references: Deangelis *et al.* 2008

### **9. Melbourne AMD GWAS**

All individuals were of white European ancestry, 60 years of age or older. Study subjects were examined and photographed by trained ophthalmologists; fundus photographs were graded according to standardized classification systems for presence, type, size, location, and number of drusen and pigmentary abnormalities, and also for size and centrality of the late features of AMD, by two independent graders.

Cases: Late AMD: GA (sharply delineated areas of RPE hypopigmentation, larger than 175µm with visible choroidal vessels in its base) or CNV disease, (subretinal hemorrhage, fibrosis or fluorescein angiographic presence of neovascularisation documented at the time of, or prior to, enrolment in the study) in at least one eye. The worst affected eye of each case was used for classification purposes.

Controls: Presented with a normal fundus (<10 hard drusen <63 µm in size) and no altered macular pigmentation in both eyes.

Study references: NONE

### **10. Miami/Vanderbilt**

Study participants were recruited from the Duke University Eye Center (DUEC), the Vanderbilt Eye Institute (VEI), and the Bascom Palmer Eye Institute (BPEI) at the University of Miami Miller School of Medicine. All participants were examined by a retinal specialist by slit-lamp biomicroscopy and dilated fundus examination, including indirect ophthalmoscopy. Fundus imaging was also obtained from all subjects.

Cases: Images were scored using a modified grading system based on the Age-Related Eye Disease Study (AREDS) described in detail elsewhere<sup>27</sup>. Briefly, the grading system was scored from 1 to 5. Early AMD: Grade 3. Late AMD: Grades 4-5.

Controls: Images were scored using a modified grading system based on the Age-Related Eye Disease Study (AREDS) described in detail elsewhere Schmidt *et al.* 2000. Briefly, the grading system was scored from 1 to 5. The 1 and 2 categories corresponded to controls.

Study references: Schmidt *et al.* 2000

### **11. Michigan/Mayo Clinic/AREDS/UPENN (MMAP)**

### **11.1. Michigan/Mayo Clinic/UPENN**

The University of Michigan cohort included affected patients who were enrolled primarily from the retina clinic of the Kellogg Eye Center and control participants were enrolled primarily from the general ophthalmology clinics of the Kellogg Eye Center. For the University of Pennsylvania cohort, subjects were ascertained through the ophthalmology practices of the University of Pennsylvania (Dr. Dwight Stambolian and colleagues) as well as subjects who participated in the clinical trial of the CAPT study. The Mayo subjects were enrolled from the practices of Dr. Albert Edwards and selected colleagues from Dallas, TX and Rochester, MN starting in 1998. All subjects were examined by an ophthalmologist. The study was approved by local Institutional Review Boards and all subjects gave informed consent prior to participation.

Cases: Affected with GA, CNV, or large drusen in at least one eye. If any of the above is only detected in one eye, the evidence of drusen or pigment changes must be found in the fellow eye. Cases were classified with regard to form of disease in the worse eye (neovascularization was considered to be the most severe outcome, large drusen were the least severe).

Controls: Examined and found to have no more than 5 hard drusen and are over the age of 50 (Mayo clinic cohort) or small drusen and pigment changes in one eye only and are over the age of 60 (UMich and UPenn clinic cohorts).

Study references: Abecasis *et al.* 2004, Chen *et al.* 2010, Zarepari *et al.* 2005

### **11.2. Age-Related Eye Disease Study Research Group (AREDS)**

The AREDS participants had annual fundus photographs for a mean duration of 10 years. These fundus photographs were graded centrally by a reading center with a standardized protocol.

Cases: The cases had evidence of neovascular AMD or geographic atrophy associated with AMD.

Controls: participants with no and minimal small drusen only during the entire 10 years of follow-up.

Study references: Age-Related Eye Disease Study Research Group 2001, Age-Related Eye Disease Study Research Group 2001

### **12. Rotterdam Study**

Prospective population-based study of people aged 55 years and older. All participants have undergone the same examinations. Fundus photographs were graded using the modified International Classification and Grading System.

Cases: Late AMD: CNV and/or GA lesions; Early AMD: Soft distinct drusen and pigmentary changes or soft indistinct drusen with or without pigmentary changes. On request from Consortium: cases with large drusen > 125  $\mu\text{m}$ .

Controls: No AMD lesions or only small hard drusen (<63  $\mu\text{m}$ ) and no pigmentary changes.

Study references: Hofman *et al.* 2009, van Leeuwen *et al.* 2003

### **13. Tufts Medical Center/Massachusetts General Hospital**

Cases: All 912 cases participants had European ancestry and were unrelated. Subjects were classified according to the Clinical Age-Related Maculopathy Grading Staging System (CARMS) into 5 stages (as described in Seddon *et al.* 1997, Seddon *et al.* 2006): no age-related macular degeneration (AMD) (stage 1), early AMD (stage 2), intermediate AMD (stage 3), and two advanced stages of AMD:

geographic atrophy (stage 4) and neovascular disease (stage 5) by JMS. For this study, only confirmed cases of advanced AMD including geographic atrophy and neovascular disease (CARMS grades 4 and 5) based on ocular examination and fundus photography as well as other ocular imaging were included. Subject samples were derived from ongoing studies of JMS at Tufts Medical Center.

Controls: Examined control participants (N=491) had European ancestry, were unrelated to other controls and unrelated to cases, and had confirmed lack of signs of age-related macular degeneration based on ocular examination and fundus photography (CARMS grade 1). These subjects were participants in ongoing studies of JMS at Tufts Medical Center. An additional cohort of 1188 controls were analyzed with the same genotyping platform (AFFY 6.0) were derived from the Myocardial Infarction Genetics (MIGEN) project.

Study references: Seddon *et al.* 2006, Yu *et al.* 2011, Sobrin *et al.* 2011, Neale *et al.* 2010, Fagerness *et al.* 2009, Maller *et al.* 2007, Maller *et al.* 2006, Kathiresan *et al.* 2009

#### **14. UCSD GA Study**

Cases: Participants underwent a standard examination, which included visual acuity measurements, dilated slit lamp biomicroscopy, and stereoscopic color fundus photography. Grading was carried out with the classification established by AREDS. Diagnosis of advanced AMD was based on the presence of CNV (equivalent to AREDS category 4 or 5).

Controls: > 60 years old, having fewer than 5 small drusen (< 63  $\mu\text{m}$  diameter), and no RPE abnormalities.

Study references: NONE

## **Replication Datasets**

Genetic analyses in all studies where replication was undertaken were reviewed and approved by local Institutional Review Boards. In addition, subjects gave informed consent prior to enrollment.

### **15. AMD-EU-JHU**

See GWAS data set “AMD-EU-JHU”

### **16. Beaver Dam Eye Study (BDES)**

Cases: Late AMD: (CNV, GA or mixed); Early AMD: Drusen size >125 microns with or without pigmentary abnormalities who never developed late AMD during the twenty years of follow-up.

Controls: Did not develop early or late AMD during the twenty years of follow-up. Controls were selected to have been seen at at least one of the follow-up exam and to have only no or small hard drusen in either eye at any time point, thus showing no signs of early or late AMD.

Study references: NONE

### **17. Oregon**

Cases: The sporadic case cohort is recruited through our clinical practice at the Casey Eye Institute, Oregon Health Sciences University. All are >60 years old, unrelated, AREDS category 4 photo verified advanced AMD, either geographic atrophy, neovascular AMD, or both.

Controls: Are based controls (>60 yrs) are recruited from our general ophthalmology clinic. All controls are fundus photo verified as no signs of AMD.

Study references: NONE

### **18. Central Greece cohort**

Cases: This cohort included 24 individuals with AREDS 2, 47 with AREDS 3, 156 with AREDS 4a, b, or c.

Controls: 213 normals with AREDS 0/1.

These patients were recruited from the medical retina outpatient clinic at the University Hospital of Larissa, Greece. The diagnosis of macular degeneration was confirmed by optical coherence tomography and fluorescein angiography. Color fundus photographs and indocyanine green angiography were performed in some cases.

Study references: Silveira *et al.* 2010

### **19. Cleveland Clinic Foundation/ Veteran Affairs Medical Center Cohort (CCF/VAMC)**

Cases: Subjects with large or extensive intermediate drusen, CNV or GA in at least one eye (AREDS severity groups 3, 4, 5).

Controls: Subjects with at most, small, hard drusen and no signs of AMD (AREDS group 1) and no family history of retinal disease.

Study references: NONE

### **20. Columbia University AMD Genetics Study**

Cases: Patients with advanced AMD were subdivided into two phenotypic categories -- geographic atrophy (GA; stage 4) and exudative (CNV; stage 4) AMD – based on the classification of their most

severe eye at the time of their entry into the study. Age > 60. All study subjects were examined by trained ophthalmologists.

Controls: Did not exhibit any distinguishing signs of macular disease or have a known family history of AMD (stage 0). Age > 60. All study subjects were examined by trained ophthalmologists.

Study references: Hageman *et al.* 2005

### **21. Genetics of Age-related Maculopathy (GARM) (University of Pittsburgh/UCLA)**

Cases: The diagnostic criteria were based on a combination of both clinical records and fundus photographs that were provided retrospectively by clinical practitioners unaffiliated with the research group. All records were reviewed and abstracted separately by a single retina specialist (MBG) and the masked photographs were independently graded by the same specialist. Clinical features included drusen (type, quantity, size), pigmentary changes (including pigment epithelial detachments) and/or the presence of end-stage disease (GA and/or CNV membranes). The determination of severity was based on the more severely affected eye. In only a few cases were single eye patients considered and they were treated as if this was the more severely affected eye. In those instances in which there were only photographs of one eye, the records for both eyes were evaluated. GA was excluded if there was evidence of a prior CNV or laser in that eye (by clinical history and/or from retinal photographs). Subjects were classified as exudative AMD based on a lesion in one or both eyes and/or as atrophic AMD based on clear evidence of GA in at least one eye for which there was no prior history of laser or macular surgery.

Individuals in which the photographs and/or records were suboptimal or for whom the disease was so advanced as to obliterate the earlier features of AMD were considered to be AMD cases, unless there was any documentation that was suggestive of an alternative etiology of macular disease.

Controls: Individuals  $\geq 65$  years old for whom eye-care records and/or fundus photographs indicated either no evidence of any macular changes (including drusen) or a small number (<10) of hard drusen ( $\leq 50$  micron in diameter) without any other retinal pigment epithelial (RPE) changes.

Study references: Jakobsdottir *et al.* 2005

### **22. Iowa cohort**

Individuals were of European-American descent, over the age of 60, and enrolled under Institutional Review Board (Columbia University and University of Iowa) approved protocols. Patients were examined by trained ophthalmologists. All stereo fundus photographs were graded according to standardized classification systems. Controls did not exhibit any distinguishing signs of macular disease or have a known family history of AMD (stage 0). AMD patients were subdivided into phenotypic categories [eAMD (stages 1a, 1b, 2a, 2b, and 3), geographic atrophy (GA; stage 4) and exudative (choroidal neovascularization; stage 4)] AMD based on the classification of their most severe eye at the time of their recruitment.

Cases: This cohort included 153 individuals with AREDS 2, 83 with AREDS 3, 782 with AREDS 4a, b, or c.

Controls: 426 normals with AREDS 0/1.

Study references: Hageman *et al.* 2005

### **23. Melbourne AMD GWAS**

See GWAS data set “Melbourne AMD GWAS”

### **24. Miami/Vanderbilt**

See GWAS data set “Miami/Vanderbilt”

### **25. NESC (The New England Sibling Pair Cohort)**

Cases: This cohort included 43 subjects with AREDS 2, 63 with AREDS 3, 420 with AREDS 4a, b, or c, and.

All subjects included in this analysis were of Caucasian descent and were recruited from the Retina Service of the Massachusetts Eye and Ear Infirmary in Boston, MA; Associated Retina Consultants at the William Beaumont Hospital in Royal Oak, MI; and Queen’s University, Belfast, Northern Ireland, UK. All probands were at least 50 years of age and had CNV in at least one eye. CNV cases were diagnosed via evaluation of fundus photographs or fluorescein angiograms, and defined as having subretinal hemorrhage, fibrosis, or fluorescein angiographic presence of neovascularization either prior to or at the time of enrollment in the study. Cases were excluded if individuals had any signs of pathologic myopia, presumed ocular histoplasmosis syndrome, angioid streaks, choroidal rupture, any hereditary retinal diseases other than AMD, previous laser treatment due to retinal conditions other than AMD, and/or if retinal pigment epithelium detachment was the only exudative finding present, as this may not represent definite CNV.

Controls: 250 normals with AREDS 0/1

These patients were recruited from the Massachusetts Eye and Ear Infirmary in Boston, MA.

Controls were excluded if there was evidence of large drusen (>63 µm in diameter), greater than 5 small drusen (<63 µm in diameter), pigment abnormalities, and/or neovascularization or other forms of AMD such as GA. Controls were recruited from siblings of probands and must have had a confirmed diagnosis of normal macula at an age greater than the affected sibling’s recorded age of onset for CNV. Disease status of every participant was typically verified by at least 2 investigators, except in instances when an unaffected sibling had to be evaluated by a single investigator during a home visit.

Study references: DeAngelis *et al.* 2004

### **26. NHS (Nurses Health Study) and HPFS (Health Professionals Follow Up Study):**

Cases: This cohort included 293 individuals with AREDS 2, 164 with AREDS 4a, b, or c.

We used a validated 2-stage procedure to document incident cases of AMD. Briefly, we asked participants on each biennial study questionnaire about the diagnosis of AMD. When AMD was reported, we requested permission to review medical records. If permission was granted, we sent a letter to the participant’s ophthalmologist to obtain information on the date of AMD diagnosis, best-corrected visual acuity at the most recent examination, and the chorioretinal lesions present (drusen; retinal pigment epithelium changes including atrophy, hypertrophy and retinal pigment epithelium detachment; geographic atrophy; subretinal neovascular membrane; disciform scar), and other information. We classified cases as neovascular AMD if there was a retinal pigment epithelium detachment, subretinal neovascular membrane, or disciform scar not due to other factors (eg, histoplasmosis, choroidal rupture). Only participants in whom we confirmed the presence

neovascular AMD with a visual acuity of 20/30 or worse attributable to AMD, who were first diagnosed after the date of receipt of the baseline blood specimen and were aged 50 years or older, were selected as cases for the present study. We classified participants based on the most severely affected eye.

Controls: 1070 age and sex-matched normals with AREDS 0/1. Three controls were selected for each case of neovascular AMD at random from study participants in the same cohort as the cases who were still at risk of AMD at the time the case was diagnosed; they were of the same age within 1 year and reported having an eye examination in the past 2 years.

Study references: Schaumberg *et al.* 2010

### **27. MMAP and National Eye Institute (NEI)**

See GWAS data set "MMAP"

The NEI clinical center participants also had fundus photographs in a cross-sectional evaluation.

Cases: Those with CNV AMD and GA associated with AMD.

Controls: Either no drusen or small drusen.

### **28. Singapore AMD Genetic Study (SAGe)**

Cases: Clearly defined CNV secondary to AMD. Choroidal neovascularization secondary to AMD was defined as serosanguineous maculopathy without evidence of PCV in patients 60 years of age or older and no evidence of other neovascular maculopathies. Equivocal cases were not included; patients with a combination of PCV and CNV lesions were not included in this study. All AMD cases in the replication sample were ethnically Chinese.

Controls: Identified from a population-based cohort—Singapore Chinese Eye Study (SCES). We included only subjects who were 60 years of age or older, and had no hard drusen, any soft drusen, any retinal pigment abnormalities, and no signs of early or late AMD.

Study references: Lavanya *et al.* 2009, Sng *et al.* 2011, Cackett *et al.* 2011

### **29. Seoul National University Bundang Hospital (SNUBH)**

Cases: This cohort included 112 individuals with AREDS 3, 352 with AREDS 4a, b, or c.

Controls: 399 normals with AREDS 0/1. These cases and controls were recruited from a hospital-based clinic at the Seoul National University Bundang Hospital in Korea.

Study references: NONE

### **30. The Southern German AMD study**

Consists of AMD patients and controls from the University Eye Clinics of München, Tübingen and Würzburg (Germany).

Cases: All AMD patients were examined by trained ophthalmologists. Stereo fundus photographs were graded according to standardized classification systems<sup>5</sup> with minor modifications due to the application of 50° digital fundus images and the inclusion of HRA-AF and infrared reflectance images for the evaluation of geographic atrophy and reticular drusen. AMD subphenotypes: Based on the grading of the worse eye (early AMD < GA or NV < Mixed NV/GA).



Controls (The Southern German AMD study): Examined by trained ophthalmologists

Study references: Rivera *et al.* 2005

**31. UCSD GA Study:**

See GWAS data set "UCSD GA Study"

**32. Utah cohort:**

Individuals were of European-American descent, over the age of 60, and enrolled under Institutional Review Board (Columbia University and University of Iowa) approved protocols. Patients were examined by trained ophthalmologists. All stereo fundus photographs were graded according to standardized classification systems. Controls did not exhibit any distinguishing signs of macular disease or have a known family history of AMD (stage 0). AMD patients were subdivided into phenotypic categories [eAMD (stages 1a, 1b, 2a, 2b, and 3), geographic atrophy (GA; stage 4) and exudative (choroidal neovascularization; stage 4)] AMD based on the classification of their most severe eye at the time of their recruitment.

Cases: This cohort included 45 individuals with AREDS 2, 93 with AREDS 3, 342 with AREDS 4a, b, or c.

Controls: 112 normals with AREDS 0/1. These subjects were recruited from clinics in Utah.

Study references: Hageman *et al.* 2005

## FUNDING SOURCES

The AMD-EU-JHU study was supported by the National Human Genome Research Institute (NHGRI/NIH, 1U54HG006542-01); Foundation Fighting Blindness (NNRI; NNCD-CL-0310.0049-JHU-WG; CD-CL-0808-0466-CHNO; C-CMM-0907-0428-INSERM04); Ville de Paris and region Ile de France; Israel Science Foundation/ISF (849/08); Wellcome Trust; Macula Vision Research Foundation; TFC Frost Charitable Trust; Brian Mercer Charitable Trust; Gift of Sight; European Commission (EU FP6, LSHG-CT-2005-512036); American Health Assistance Foundation (AHAF; M2010042); Research to Prevent Blindness; Dr. Frieda Derdeyn Bambas Professorship of Ophthalmology; Distinguished Brumley Professorship.

The BDES, the VRF (India) and the CCF/VAMC studies were supported by the National Institutes of Health/NIH (EY06594, EY015810, U10EY06594, EY015286, EY13438, and EY10605); Research to Prevent Blindness; Retina Research Foundation; VA Merit Review; Department of Biotechnology, Government of India, New Delhi, India (DBT/PR7788/MED/12/299/2006).

The BMES study was supported by National Health and Medical Research Council (NHMRC) Australia (211069, 475604, 512423, 529912, and 974159); Centre for Clinical Research Excellence in Translational Clinical Research in Eye Diseases; CCRE in TCR-Eye (529923); Research to Prevent Blindness; the Wellcome Trust U.K., as part of Wellcome Trust Case Control Consortium 2 (awards 085475/B/08/Z and 085475/08/Z to Drs. Viswanathan, McGuffin, Mitchell, Topouzis and Foster).

The BU/UTAH studies were supported by the National Institutes of Health/NIH (R24 EY017404-01, EY014458, EY017362, EY017404, R01EY013834, K23EY000365, R01EY009611, P01CA87969, R01CA49449, and R01HL35464); Guide Dogs for the Blind Association; Department of Health and Social Security (DHSS-R&D); Educational Resource Development Council (University of Utah); Research to Prevent Blindness; Edward N. & Della L. Thome Memorial Foundation; National Health and Medical Research Council of Australia; American Macular Degeneration Foundation; Alcon Research Award; Cumming Foundation; National Research Foundation of Korea (2009-0072603).

The Oregon study was supported by the National Institutes of Health/NIH (R01 EY021532-01A1).

The Columbia study was supported by the National Institutes of Health/NIH (R01-EY021163, R01-EY013435, EY019861, P30-EY019007); Research to Prevent Blindness (New York, NY).

The Southern German AMD study team was supported by Deutsche Forschungsgemeinschaft/DFG (WE1259/18-1 and WE 1259/19-2); Bundesministerium für Bildung und Forschung/BMBF (01ER1206); Ruth and Milton Steinbach Foundation, New York; Alcon Research Institute; PRO RETINA-Stiftung zur Verhütung von Blindheit.

The JAREDS study was supported by Ministry of Education, Culture, Sports, Sciences and Technology of the Japanese government.

The Melbourne AMD study was supported by the Australia-India Strategic Research Fund (AISRF) jointly funded through the Department of Innovation, Industry, Science and Research, Government of Australia and the Department of Biotechnology, Government of India; National Health and Medical Research Council Australia Centre for Clinical Research Excellence in Translational Clinical Research in Eye Diseases; CCRE in TCR-Eye (529923). The Centre for Eye Research Australia (CERA) receives operational infrastructure support from the Victorian Government.

The Miami/Vanderbilt study was supported by the National Institutes of Health/NIH (T32EY021453 and R01 EY012118).

The MMAP/NEI study was supported by the National Institutes of Health/NIH (R01 EY022005, R01 EY016862, and EYR01 014467), Intramural Research Program of the National Eye Institute/NEI; Foundation Fighting Blindness; Research to Prevent Blindness.

The Rotterdam study was supported by Erasmus MC/Erasmus Universiteit; ZonMw; RIDE; Ministerie van Onderwijs, Cultuur en Wetenschappen; Ministerie van Volksgezondheid, Welzijn en Sport; Europese Commissie (DG XII); Gemeente Rotterdam; Netherlands Genomics Initiative (NGI); Lijf en Leven; MD Fonds; Henkes Stichting Oogfonds Nederland; Stichting Nederlands Oogheelkundig Onderzoek Swart van Essen; Bevordering van Volkskracht; Blindenhulp; LSBS; Rotterdamse Vereniging voor Blindenbelangen; OOG; ANVVB Stichting Talent; Rotterdams Oogheelkundig Onderzoeks Stichting Rotterdam Eye Hospital Research Foundation

The SAGe study was supported by National Medical Research Council, Singapore (NIG/1035/2010 and STaR/0003/2008); Biomedical Research Council, Singapore (BMRC 09/1/35/19/616 and 08/1/35/19/550); SingHealth Foundation, Singapore (SHF/FG381P/2007); American Health Assistance Foundation, USA (The Macular Degeneration Research Program Grant).

The Tufts/MGH study was supported by an anonymous donor for the Affymetrix 6.0 GWAS genotyping and by the National Institutes of Health/NIH (K12-EY16335 and R01-EY11309); Massachusetts Lions Eye Research Fund, Inc.; Research to Prevent Blindness, Inc. New York, NY; Macula Vision Research Foundation; American Macular Degeneration Foundation; Macular Degeneration Research Fund of the Ophthalmic Epidemiology and Genetics Service, New England Eye Center, Tufts Medical Center, Boston, MA.

The UK Cambridge / Edinburgh Study was supported by the Medical Research Council, UK (G0000067); Macular Disease Society; Guide Dogs for the Blind Association (OR2006-02d); Wellcome Trust (061860, 091388, 061858, 091157, and 068545/Z/02); Juvenile Diabetes Research Foundation (4-2000-948, 9-2005-25 and 9-2011-253); Macula Vision Research Foundation; Chief Scientist Office, Scotland (CZB/4/79); Department of Health's NIHR Biomedical Research Centre for Ophthalmology at Moorfields Eye Hospital and UCL Institute of Ophthalmology and Manchester NIHR Biomedical Research Centre (The views expressed in the publication are those of the authors and not necessarily those of the Department of Health); Medical Research Council (G0000934).

The Genetics of Age Related-Maculopathy (UCLA/Pittsburgh) study was supported by the National Institutes of Health/NIH (R01 EY09859); U.S. Department of Health and Human Services/HHS (American Recovery and Reinvestment Act / ARRA, 3R01EY009859-14S1); Research to Prevent Blindness; and the Harold and Pauline Price Foundation.

The UCSD GA study was supported by the National Institutes of Health/NIH (EY014428, EY018660, EY019270); VA Merit Award, Research to Prevent Blindness; Burroughs Wellcome Fund.

The funding organizations did not have any involvement in study design and data collection, analysis, and interpretation.

## SUPPLEMENTARY REFERENCES

1. Pruim, R.J. *et al.* LocusZoom: regional visualization of genome-wide association scan results. *Bioinformatics* **26**, 2336-7 (2010).
2. Nyholt, D.R. A simple correction for multiple testing for single-nucleotide polymorphisms in linkage disequilibrium with each other. *Am J Hum Genet* **74**, 765-9 (2004).
3. Brooks, M.J., Rajasimha, H.K., Roger, J.E. & Swaroop, A. Next-generation sequencing facilitates quantitative analysis of wild-type and Nrl(-/-) retinal transcriptomes. *Molecular Vision* **17**, 3034-54 (2011).
4. Age-Related Eye Disease Study Research Group. The Age-Related Eye Disease Study (AREDS): design implications. AREDS report no. 1. *Control Clin Trials* **20**, 573-600 (1999).
5. Bird, A.C. *et al.* An international classification and grading system for age-related maculopathy and age-related macular degeneration. The International ARM Epidemiological Study Group. *Surv Ophthalmol* **39**, 367-74 (1995).
6. Holz, F.G. *et al.* Progression of geographic atrophy and impact of fundus autofluorescence patterns in age-related macular degeneration. *Am J Ophthalmol* **143**, 463-72 (2007).
7. Lotery, A., Xu, X., Zlatava, G. & Loftus, J. Burden of illness, visual impairment and health resource utilisation of patients with neovascular age-related macular degeneration: results from the UK cohort of a five-country cross-sectional study. *Br J Ophthalmol* **91**, 1303-7 (2007).
8. Sivakumaran, T.A. *et al.* A 32 kb Critical Region Excluding Y402H in CFH Mediates Risk for Age-Related Macular Degeneration. *PLoS ONE* **6**, e25598 (2011).
9. Vijaya, L. *et al.* Prevalence of primary angle-closure disease in an urban south Indian population and comparison with a rural population. The Chennai Glaucoma Study. *Ophthalmology* **115**, 655-660 e1 (2008).
10. Klein, R. *et al.* The Wisconsin age-related maculopathy grading system. *Ophthalmology* **98**, 1128-34 (1991).
11. Mitchell, P., Smith, W., Attebo, K. & Wang, J.J. Prevalence of age-related maculopathy in Australia. The Blue Mountains Eye Study. *Ophthalmology* **102**, 1450-60 (1995).
12. Mitchell, P., Wang, J.J., Foran, S. & Smith, W. Five-year incidence of age-related maculopathy lesions: the Blue Mountains Eye Study. *Ophthalmology* **109**, 1092-7 (2002).
13. Wang, J.J. *et al.* Ten-year incidence and progression of age-related maculopathy: the blue Mountains Eye Study. *Ophthalmology* **114**, 92-8 (2007).
14. Yates, J.R. *et al.* Complement C3 variant and the risk of age-related macular degeneration. *N Engl J Med* **357**, 553-61 (2007).
15. Deary, I.J., Whiteman, M.C., Starr, J.M., Whalley, L.J. & Fox, H.C. The impact of childhood intelligence on later life: following up the Scottish mental surveys of 1932 and 1947. *J Pers Soc Psychol* **86**, 130-47 (2004).
16. Barrett, J.C. *et al.* Genome-wide association study and meta-analysis find that over 40 loci affect risk of type 1 diabetes. *Nat Genet* **41**, 703-707 (2009).
17. Power, C. & Elliott, J. Cohort profile: 1958 British birth cohort (National Child Development Study). *Int J Epidemiol* **35**, 34-41 (2006).
18. The Wellcome Trust Case Control Consortium. Genome-wide association study of 14,000 cases of seven common diseases and 3,000 shared controls. *Nature* **447**, 661-78 (2007).
19. Wellcome Trust Case Control Consortium. Genome-wide association study of 14,000 cases of seven common diseases and 3,000 shared controls. *Nature* **447**, 661-78 (2007).
20. Cipriani, V. *et al.* Genome-wide association study of age-related macular degeneration identifies associated variants in the TNXB-FKBPL-NOTCH4 region of chromosome 6p21.3. *Hum Mol Genet* **21**, 4138-50 (2012).
21. Magnusson, K.P. *et al.* CFH Y402H confers similar risk of soft drusen and both forms of advanced AMD. *PLoS Med* **3**, e5 (2006).

22. Rivera, A. *et al.* Hypothetical LOC387715 is a second major susceptibility gene for age-related macular degeneration, contributing independently of complement factor H to disease risk. *Hum Mol Genet* **14**, 3227-36 (2005).
23. Holle, R., Happich, M., Lowel, H. & Wichmann, H.E. KORA--a research platform for population based health research. *Gesundheitswesen* **67 Suppl 1**, S19-25 (2005).
24. Arakawa, S. *et al.* Genome-wide association study identifies two susceptibility loci for exudative age-related macular degeneration in the Japanese population. *Nature Genetics* **43**, 1001-4 (2011).
25. Nakamura, Y. The BioBank Japan Project. *Clin Adv Hematol Oncol* **5**, 696-7 (2007).
26. Deangelis, M.M. *et al.* Alleles in the HtrA serine peptidase 1 gene alter the risk of neovascular age-related macular degeneration. *Ophthalmology* **115**, 1209-1215 e7 (2008).
27. Schmidt, S. *et al.* Association of the apolipoprotein E gene with age-related macular degeneration: possible effect modification by family history, age, and gender. *Mol Vis* **6**, 287-93 (2000).
28. Abecasis, G.R. *et al.* Age-related macular degeneration: a high-resolution genome scan for susceptibility loci in a population enriched for late-stage disease. *Am J Hum Genet* **74**, 482-94 (2004).
29. Chen, W. *et al.* Genetic variants near TIMP3 and high-density lipoprotein-associated loci influence susceptibility to age-related macular degeneration. *Proceedings of the National Academy of Sciences of the United States of America* **107**, 7401-6 (2010).
30. Zarepari, S. *et al.* Strong Association of the Y402H Variant in Complement Factor H at 1q32 with Susceptibility to Age-Related Macular Degeneration. *Am J Hum Genet* **77**, 149-53 (2005).
31. Age-Related Eye Disease Study Research Group. The Age-Related Eye Disease Study system for classifying age-related macular degeneration from stereoscopic color fundus photographs: the Age-Related Eye Disease Study Report Number 6. *Am J Ophthalmol* **132**, 668-81 (2001).
32. Age-Related Eye Disease Study Research Group. A randomized, placebo-controlled, clinical trial of high-dose supplementation with vitamins C and E, beta carotene, and zinc for age-related macular degeneration and vision loss: AREDS report no. 8. *Arch Ophthalmol* **119**, 1417-36 (2001).
33. Hofman, A. *et al.* The Rotterdam Study: 2010 objectives and design update. *European Journal of Epidemiology* **24**, 553-72 (2009).
34. van Leeuwen, R. *et al.* Blood pressure, atherosclerosis, and the incidence of age-related maculopathy: the Rotterdam Study. *Investigative Ophthalmology and Visual Science* **44**, 3771-7 (2003).
35. Seddon, J.M., Samelson, L.J., Page, W.F. & Neale, M.C. Twin study of macular degeneration: methodology and application to genetic epidemiologic studies [ARVO abstract]. *Invest Ophthalmol Vis Sci* **38**, 676 (1997).
36. Seddon, J.M., Sharma, S. & Adelman, R.A. Evaluation of the clinical age-related maculopathy staging system. *Ophthalmology* **113**, 260-6 (2006).
37. Yu, Y. *et al.* Common variants near FRK/COL10A1 and VEGFA are associated with advanced age-related macular degeneration. *Human Molecular Genetics* **20**, 3699-709 (2011).
38. Sobrin, L. *et al.* ARMS2/HTRA1 locus can confer differential susceptibility to the advanced subtypes of age-related macular degeneration. *American Journal of Ophthalmology* **151**, 345-52 e3 (2011).
39. Neale, B.M. *et al.* Genome-wide association study of advanced age-related macular degeneration identifies a role of the hepatic lipase gene (LIPC). *Proceedings of the National Academy of Sciences of the United States of America* **107**, 7395-400 (2010).
40. Fagerness, J.A. *et al.* Variation near complement factor I is associated with risk of advanced AMD. *Eur J Hum Genet* **17**, 100-4 (2009).
41. Maller, J.B. *et al.* Variation in complement factor 3 is associated with risk of age-related macular degeneration. *Nat Genet* **39**, 1200-1 (2007).

42. Maller, J. *et al.* Common variation in three genes, including a noncoding variant in CFH, strongly influences risk of age-related macular degeneration. *Nat Genet* **38**, 1055-9 (2006).
43. Kathiresan, S. *et al.* Common variants at 30 loci contribute to polygenic dyslipidemia. *Nature Genetics* **41**, 56-65 (2009).
44. Silveira, A.C. *et al.* Convergence of linkage, gene expression and association data demonstrates the influence of the RAR-related orphan receptor alpha (RORA) gene on neovascular AMD: a systems biology based approach. *Vision Res* **50**, 698-715 (2010).
45. Hageman, G.S. *et al.* A common haplotype in the complement regulatory gene factor H (HF1/CFH) predisposes individuals to age-related macular degeneration. *Proc Natl Acad Sci U S A* **102**, 7227-32 (2005).
46. Jakobsdottir, J. *et al.* Susceptibility genes for age-related maculopathy on chromosome 10q26. *Am J Hum Genet* **77**, 389-407 (2005).
47. DeAngelis, M.M. *et al.* Extremely discordant sib-pair study design to determine risk factors for neovascular age-related macular degeneration. *Arch Ophthalmol* **122**, 575-80 (2004).
48. Schaumberg, D.A. *et al.* Prospective study of common variants in the retinoic acid receptor-related orphan receptor alpha gene and risk of neovascular age-related macular degeneration. *Arch Ophthalmol* **128**, 1462-71 (2010).
49. Lavanya, R. *et al.* Methodology of the Singapore Indian Chinese Cohort (SICC) eye study: quantifying ethnic variations in the epidemiology of eye diseases in Asians. *Ophthalmic Epidemiol* **16**, 325-36 (2009).
50. Sng, C.C. *et al.* Toll-like receptor 3 polymorphism rs3775291 is not associated with choroidal neovascularization or polypoidal choroidal vasculopathy in Chinese subjects. *Ophthalmic Research* **45**, 191-6 (2011).
51. Cackett, P. *et al.* Relationship of smoking and cardiovascular risk factors with polypoidal choroidal vasculopathy and age-related macular degeneration in Chinese persons. *Ophthalmology* **118**, 846-52 (2011).
